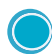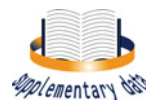

## OPEN ACCESS

# Characterization of the bipartite degron that regulates ubiquitin-independent degradation of thymidylate synthase

Karen W. BARBOUR\*†, Yang-Yang XING\*†, Edsel A. PEÑA\*‡ and Franklin G. BERGER\*†<sup>1</sup>

\*Center for Colon Cancer Research, University of South Carolina, Columbia, SC 29208, U.S.A., †Department of Biological Sciences, University of South Carolina, Columbia, SC 29208, U.S.A., and ‡Department of Statistics, University of South Carolina, Columbia, SC 29208, U.S.A.

## Synopsis

TS (thymidylate synthase) is a key enzyme in the *de novo* biosynthesis of dTMP and is indispensable for DNA replication. Previous studies have shown that intracellular degradation of the human enzyme [hTS (human thymidylate synthase)] is mediated by the 26S proteasome, and occurs in a ubiquitin-independent manner. Degradation of hTS is governed by a degron that is located at the polypeptide's N-terminus that is capable of promoting the destabilization of heterologous proteins to which it is attached. The hTS degron is bipartite, consisting of two subdomains: an IDR (intrinsically disordered region) that is highly divergent among mammalian species, followed by a conserved amphipathic  $\alpha$ -helix (designated hA). In the present report, we have characterized the structure and function of the hTS degron in more detail. We have conducted a bioinformatic analysis of interspecies sequence variation exhibited by the IDR, and find that its hypervariability is not due to diversifying (or positive) selection; rather, it has been subjected to purifying (or negative) selection, although the intensity of such selection is relaxed or weakened compared with that exerted on the rest of the molecule. In addition, we have verified that both subdomains of the hTS degron are required for full activity. Furthermore, their co-operation does not necessitate that they are juxtaposed, but is maintained when they are physically separated. Finally, we have identified a 'cryptic' degron at the C-terminus of hTS, which is activated by the N-terminal degron and appears to function only under certain circumstances; its role in TS metabolism is not known.

**Key words:** proteasome, relaxed purifying selection, thymidylate synthase, ubiquitin-independent

Cite this article as: Barbour, K.W. Xing, Y.-Y., Peña, E.A. and Berger, F.G. (2013) Characterization of the bipartite degron that regulates ubiquitin-independent degradation of thymidylate synthase. *Biosci. Rep.* **33**(1), art:e00015.doi:10.1042/BSR20120112

## INTRODUCTION

The pyrimidine biosynthetic enzyme TS (thymidylate synthase; EC 2.1.1.45) catalyses the reductive methylation of dUMP by  $N^5N^{10}$ -methylene tetrahydrofolate, to form TMP and DHF (dihydrofolate) [1,2]. In being the sole *de novo* source of TMP for cellular DNA replication and repair, the enzyme has been an effective target for chemotherapeutic drugs used in the treatment of cancer [1,2]. Anti-metabolites such as 5-fluorouracil and raltitrexed form TS substrate analogues that bind to and inhibit the enzyme, leading to reduced thymidylate pools and apoptosis. X-ray crystallographic studies of the TS polypeptide from an

evolutionarily wide range of eukaryotic and prokaryotic species have shown that the enzyme is highly conserved in terms of the location of secondary structural elements and overall three-dimensional (3D) conformation [3–6].

In previous work, we demonstrated that the intracellular stability of TS is increased by the binding of inhibitory ligands [7], a phenomenon that potentially constrains the effectiveness of TS-directed anti-cancer agents. Subsequent studies showed that the human enzyme [designated hTS (human thymidylate synthase)] is degraded by the 26S proteasome in a ubiquitin-independent manner [8–11]. Most proteasomal substrates require ligation of ubiquitin moieties to be recognized and degraded by the proteasome [12]. However, an increasing number of substrates

**Abbreviations used:** CHX, cycloheximide; eGFP, enhanced green fluorescent protein; FEL, fixed effects likelihood; GFP, green fluorescent protein; hA,  $\alpha$ -helix; HLH, helix-loop-helix; hTS, human thymidylate synthase; IDR, intrinsically disordered region; ODC, ornithine decarboxylase; PUB, prokaryotic ubiquitin-like protein; REL, random effects likelihood; SNAP, Synonymous Non-synonymous Analysis Program; TS, thymidylate synthase.

<sup>1</sup> To whom correspondence should be addressed (e-mail fgberger@mailbox.sc.edu).

do not require ubiquitinylation, including ODC (ornithine decarboxylase) [13,14], tumour suppressor p21<sup>Waf1/Cip1</sup> [15,16], the NF- $\kappa$ B (nuclear factor  $\kappa$ B) regulator I $\kappa$ B $\alpha$  (inhibitor of  $\kappa$ B $\alpha$ ) [17,18], apomyoglobin [19] and the yeast transcription factor Rpn4 [20], among others. Thus, hTS is a model for ubiquitin-independent protein turnover.

Studies in our laboratory have shown that an N-terminal segment of hTS spanning the first 45 residues is required for degradation, defining the region as a degron [9–11]. The hTS degron is portable, in that it is capable of destabilizing a heterologous protein to which it is attached [9–11]. Furthermore, it is bipartite in nature, comprising of two co-operating subdomains: an IDR (intrinsically disordered region) spanning residues 1–27, and an amphipathic  $\alpha$ -helix (designated hA) at residues 31–42 [9]. The IDR is hypervariable in amino acid sequence among mammalian species [11], although its disordered nature has been conserved [4–6,11]. A free, unmodified N-terminal amino group and an arginine–arginine motif at residues 10–11 are required for IDR activity in promoting proteasomal degradation [10,11]. The hA segment, which is much more highly conserved among species [11], requires maintenance of an  $\alpha$ -helical conformation for its degradative function [9]. Interestingly, the hTS degron is active when placed at either the N- or C-terminus of the reporter substrate [9]. The specific roles of the two subdomains in regulating hTS proteolysis have yet to be determined.

In the present report, we have carried out further analysis of the structure and function of the hTS degron. We have examined the origin of inter-species hypervariability within the IDR, and find that its tolerance of amino acid substitution derives from relaxed purifying selection, as opposed to positive Darwinian selection. We also show that co-operation between the IDR and hA does not require that the two elements be juxtaposed, but is maintained when they are physically separated. Finally, we have identified a ‘cryptic’ degron at the C-terminus of the hTS polypeptide that appears to be active only under particular circumstances.

## EXPERIMENTAL

### Bioinformatics

Sequences corresponding to the coding regions of TS mRNAs from 16 mammalian species were downloaded from the Ensembl database [21] and aligned using ClustalW2 [22,23]. Species included human (*Homo sapiens*), chimpanzee (*Pan troglodytes*), orang-utan (*Pongo abelii*), marmoset (*Callithrix jacchus*), tarsier (*Tarsius syrichta*), rhesus monkey (*Macaca mulatta*), mouse (*Mus musculus*), rat (*Rattus rattus*), guinea pig (*Cavia porcellus*), cat (*Felis catus*), dog (*Canis lupus*), cow (*Bos taurus*), horse (*Equus caballus*), pika (*Ochotona princeps*), rabbit (*Oryctolagus cuniculus*) and dolphin (*Tursiops truncatus*). A 40-codon insertion within the cow and dog sequences, corresponding to an additional exon and likely representing a cDNA copy of an incompletely processed transcript, were removed from the analysis.

Extents of synonymous and non-synonymous substitutions within the coding regions of mammalian TS transcripts were determined for all pairwise comparisons among the 16 species using SNAP (Synonymous Non-synonymous Analysis Program), as available on the HIV database website. SNAP estimates the numbers of synonymous substitutions per synonymous site ( $d_S$ ) and non-synonymous substitutions per non-synonymous site ( $d_N$ ), corrected for multiple hits [24,25]. Cumulative behaviour plots for both types of substitutions along the coding regions were constructed using the ‘xyplot’ option of SNAP.

Identification of codons where  $d_S \neq d_N$  was carried out by the FEL (fixed effects likelihood) and REL (random effects likelihood) methods, as provided on the Datamonkey webserver [26]. A *P*-value of 0.1 was set as the cut-off for FEL.

Prediction of secondary structure was done using PSIPRED, as provided on the Bioinformatics Group Server of University College London. PSIPRED is a two-stage neural network that predicts protein secondary structure based on position-specific scoring matrices [27].

### Plasmid constructs

All constructs for mutant analysis (shown in Figure 1) were generated using standard techniques and were verified directly by DNA sequencing. The parental expression plasmid was pMP610, containing a full-length eGFP [enhanced GFP (green fluorescent protein)] cDNA under the control of a CMV (cytomegalovirus) promoter. For selection of transfectants, an *Escherichia coli* TS cDNA under the control of a murine stem cell virus LTR (long terminal repeat) promoter, optimized for expression in mammalian cells by modification of codon-usage, was included in the plasmid [28]. Mutagenesis was carried out by standard PCR-based protocols. Details of all plasmid constructions are available upon request.

### Cell culture and transfection

Cell line RJK88.13, a TS-deficient derivative of V79 Chinese hamster lung cells [29], was maintained in DMEM (Dulbecco’s modified Eagle’s medium) (Cellgro) containing 4.5 g/l glucose and supplemented with 10% heat-inactivated fetal bovine serum (Atlanta Biologicals) and 10  $\mu$ M thymidine. Cells were cultured at 37 °C in a humidified 5% CO<sub>2</sub> atmosphere.

For generation of stable transfectants, RJK88.13 cells were transfected with the indicated expression plasmids using Lipofectamine<sup>TM</sup> 2000 according to the manufacturer’s instructions. Transfectants were selected in thymidine-free medium containing the nucleoside transport inhibitor dihydropyrimidinone (5  $\mu$ M; Sigma–Aldrich), pooled and maintained in mass culture.

### Determination of protein half-lives

Half-lives were assessed following the addition of 50  $\mu$ g/ml CHX (cycloheximide; Acros Organic) to the growth medium for the indicated times. Cells were harvested by scraping, and lysed in M-Per<sup>®</sup> buffer (Pierce) containing 10 mM DTT (dithiothreitol), 2 mM 2-mercaptoethanol, 5 mM PMSF, 200  $\mu$ g/ml aprotinin,

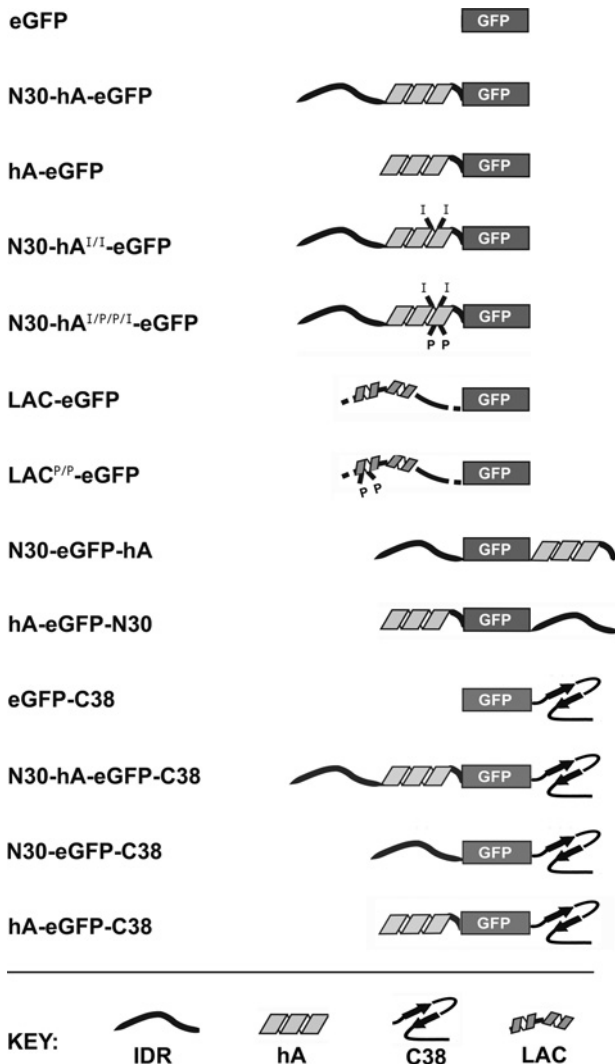

**Figure 1** Constructs used in the present study

The eGFP fusion constructs utilized in the current study are shown. Schematic depictions of the various segments are indicated in the KEY at the bottom, including the disordered region (IDR), the amphipathic  $\alpha$ -helix (hA) and the C-terminal element (C38) of hTS, as well as the N-terminal region of the *E. coli lac* repressor (LAC).

100  $\mu$ g/ml pepstatin and 50  $\mu$ g/ml leupeptin. Crude lysates were centrifuged at 15000  $g$  for 1 h at 4  $^{\circ}$ C, and protein concentrations in the resulting extracts were quantified using the Bio-Rad assay reagent with BSA as a standard.

Immunoblotting was performed by standard techniques. Following SDS/PAGE, fractionated proteins were transferred to nylon membranes, and probed with a monoclonal antibody to GFP (Santa Cruz Biotechnology; catalogue no. sc-9996). To control for equal loading, blots were reprobed with an anti-actin monoclonal antibody (Sigma-Aldrich, Clone AC-40). The antigen-antibody complexes were visualized using appropriate secondary antibodies with the ECL<sup>®</sup> (enhanced chemiluminescence) kit (Amersham Biosciences). Densitometry was carried

out using ImageJ software maintained by the National Institutes of Health. A 2-fold dilution series of each extract was included on the blots for calibration and to correct for film exposure times. All values were normalized to actin concentrations on the same blots. Data were plotted according to first-order decay kinetics, and half-lives were determined from the slopes of the resulting lines. Each half-life determination was carried out at least twice with independently prepared cells.

## RESULTS

### Origin of amino acid sequence divergence within the IDR

The amino acid sequence of the IDR within the TS degron is highly divergent among mammalian species [11]. Despite such divergence, the region's role in degradation is maintained, so long as a free, unblocked N-terminus and an arginine-arginine motif at residues 10–11 are present [10]. This, along with the observation that both the IDR and hA can be replaced with segments from unrelated proteins, led us to suggest that it is the overall structure, rather than the specific primary sequence, that is critical to degron function [9].

In order to gain a deeper understanding of IDR hypervariability and its origin, we aligned and compared the coding regions of the TS mRNAs from 16 mammalian species (Supplementary Figure S1 at <http://www.bioscirep.org/bsr/033/bsr033e015add.htm>). The IDR (encoded by nucleotides 1–81 of the human transcript) spans a maximum of 31 codons, including small insertions/deletions in some species. The remainder of the transcript (encoded by nucleotides 82–939 of the human, which includes hA) spans 286 codons and contains no insertions/deletions. Within the IDR, only 16 nucleotide sites (17.8%, not including the initiator Met codon) are completely conserved among the species; most of these are located within the region encompassing residues 5–8 (Supplementary Figure S1). In contrast, 556 sites (64.8%) within the body of the polypeptide are conserved. The difference in degree of nucleotide conservation between the IDR and the remainder of the molecule is highly significant ( $P < 10^{-16}$ ), and indicates a dramatically higher level of divergence for the IDR-encoding portion of the mammalian TS transcript.

Cumulative behaviour plots (Figure 2) indicated that synonymous substitutions are distributed equally throughout the length of the mRNA (Figure 2). They occur at a rate of  $0.227 \pm 0.0079$  per codon within the region encoding the IDR ( $R^2 = 96.96\%$ ; 95% CI = 0.211–0.243) and  $0.233 \pm 0.00073$  per codon within the region encoding the body of the polypeptide ( $R^2 = 99.72\%$ ; 95% CI = 0.231–0.234). Thus, no significant differences were observed between the two domains ( $P = 0.40$ ). In contrast, non-synonymous substitutions are distributed in a biphasic manner (Figure 2), with the rate being  $0.395 \pm 0.011$  per codon within the IDR ( $R^2 = 97.97\%$ ; 95% CI = 0.372–0.418), as compared with  $0.0660 \pm 0.0005$  per codon within the body of the molecule

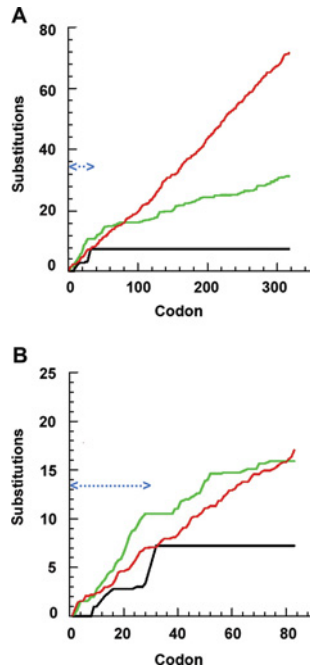

**Figure 2 Cumulative behaviour of synonymous and non-synonymous substitutions along the coding region of TS mRNA**

Accumulation of amino acid substitutions within the TS polypeptide for the 16 mammalian species, as determined by SNAP, is plotted along the coding region of the mRNA (see the Experimental section). Codon numbering refers to hTS. The entire coding region (313 codons) is shown in (A), whereas a closer view of the first 80 codons is shown in (B). The plot for synonymous substitutions is in red, while that for non-synonymous substitutions is in green. The black line shows accumulation of insertions/deletions. The IDR is indicated by a double-headed dashed line ( $\longleftrightarrow$ ).

( $R^2 = 98.09\%$ ;  $95\%$  CI =  $0.065\text{--}0.067$ ). Thus, a 6–7-fold higher rate of accumulation of non-synonymous substitutions is observed for the IDR ( $P < 10^{-16}$ ).

Within the body of the polypeptide, the occurrence of non-synonymous substitutions is 3.5-fold lower than for synonymous substitutions (i.e. 0.0660 compared with 0.233 per codon, respectively;  $P < 10^{-16}$ ) (Figure 3). This indicates strong negative selection constraining amino acid substitutions throughout most of the TS polypeptide. In contrast, within the IDR-encoding region, the rate for non-synonymous substitutions is 1.7-fold higher than for synonymous substitutions (0.395 compared with 0.227 per codon, respectively;  $P < 10^{-16}$ ) (Figure 3). This may reflect positive Darwinian selection, whereby amino acid substitutions within the IDR are beneficial or adaptive, and are therefore favoured. Alternatively, it could be a consequence of relaxed or weakened intensity of negative (or purifying) selection, indicating a greater tolerance of amino acid changes.

To distinguish between these two possibilities, we determined the proportions of non-synonymous substitutions per non-synonymous site ( $d_N$ ) and synonymous substitutions per synonymous site ( $d_S$ ), and calculated  $d_N/d_S$  ratios. Purifying, or negative, selection is indicated when such ratios are  $< 1$ , while

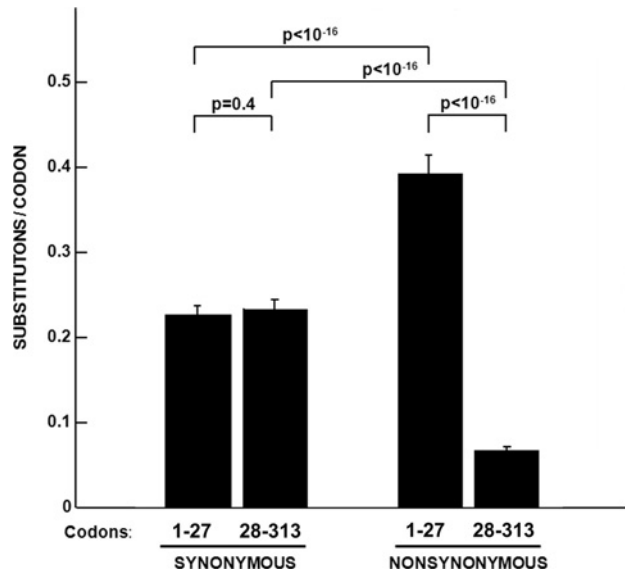

**Figure 3 Rates of accumulation of synonymous and non-synonymous substitutions along the TS mRNA**

Slopes of the plots in Figure 2 were determined by linear regression. Codons 1–27 represent the IDR of hTS, while codons 28–313 represent the rest of the polypeptide. Bars indicate values  $\pm$  S.E.M.  $P$  values are shown for various comparisons, as indicated by the brackets.

positive selection is indicated when they are  $> 1$ ;  $d_N/d_S$  ratios equal to 1 indicate neutrality, or an absence of selection. The  $d_N$  and  $d_S$  values for each of the 120 pairwise combinations among the 16 mammalian species were determined for both the IDR and the body of the polypeptide (see Supplementary Table S1 at <http://www.bioscience.org/bsr/033/bsr033e015add.htm>). Average  $d_N/d_S$  ratios were  $0.5953 \pm 0.4433$  for the IDR and  $0.0745 \pm 0.0334$  for the body of the molecule. Thus, the IDR exhibited an 8-fold higher ratio ( $P < 10^{-16}$ ) that was still significantly less than 1.0 ( $P < 10^{-16}$ ). This indicates that amino acid substitutions within the disordered segment are constrained by negative selection, albeit at a relaxed or milder intensity as compared with the remainder of the polypeptide. No evidence for positive Darwinian selection was detected.

As an independent test of this conclusion, we utilized an approach that identifies individual codons under positive or negative selection. REL is a maximum likelihood strategy that determines if  $d_N$  and  $d_S$  are significantly different at each codon along a mRNA [26]. The approach failed to detect any positively selected sites in either the IDR or the body of the TS polypeptide. In contrast, 10.0% of sites within the IDR (3 of 30, not including the initiator Met codon) and 36.4% of sites within the body of the polypeptide (104 of 286) were identified as being under negative selection. The difference in the fraction of negatively selected codons between the IDR and the body of the polypeptide is statistically significant ( $P < 10^{-4}$ ), and indicates that the intensity of negative selection is diminished in the former.

In all, our analysis indicates that positive Darwinian selection is not a major contributor to high levels of sequence divergence



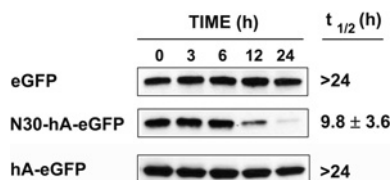

**Figure 4 hA is inactive on its own as a degron**

The indicated plasmid constructs (see the text and Figure 1) were stably transfected into cell line RJK88.13 and treated with CHX. Decreases in protein concentrations were monitored over time by Western blotting (see the Experimental section for details). A representative blot is shown for each construct. The half-lives ( $t_{1/2}$ ) are shown to the right of the corresponding blots, and are presented as means  $\pm$  S.D.

within the IDR of mammalian TS. Rather, the region is constrained by negative selection, although such selection is relaxed as compared with that exerted upon the rest of the polypeptide.

### The IDR and hA are both required for degron activity

In previous investigations [11], we found that a fusion protein containing the IDR of hTS (residues 1–30, denoted N30) appended to an eGFP reporter is resistant to degradation, as is the parental eGFP reporter itself. Inserting hA into N30–eGFP between the IDR and the reporter results in a protein (N30–hA–eGFP; see Figure 1) that is significantly destabilized (Figure 4 and [11]). On the basis of these findings, we concluded that both the IDR and hA are required for degradation. However, the possibility that hA on its own functions as a degron was not formally tested. To do this, we measured the half-life of a polypeptide, hA–eGFP, in which hA alone was ligated to eGFP (Figure 1). A stably transfected cell line expressing hA–eGFP was generated (see the Experimental section), and its half-life was measured by a CHX chase assay. As seen in Figure 4, hA–eGFP, like the parental eGFP substrate, is quite stable, having a half-life  $>24$  h. Thus, hA is inactive on its own as a degron. We conclude that neither the IDR nor hA is capable of acting alone in promoting degradation; both segments are required, and must co-operate for full degron function.

### A helical conformation is required for degron function

Earlier, we observed that insertion of helix-disrupting proline substitutions at residues 40 and 41 within the hA segment of fusion protein N30–hA–eGFP stabilized the molecule, indicating that a helical conformation is required for maximal degron function [9]. This was the case regardless of whether the degron was at the N- or C-terminal end of the reporter [9]. As a more rigorous test of this requirement, we examined an eGFP–fusion protein containing a very strong degron derived from a mutant hTS molecule. Polypeptide N30–hA<sup>I/I</sup>–eGFP (see Figure 1) contains isoleucine substitutions at positions 39 and 42 within hA, rendering the protein very unstable, with a half-life of about 0.8 h [9]. We used the secondary structure prediction tool PSIPRED [27] to assess the potential effect of proline substitutions on the

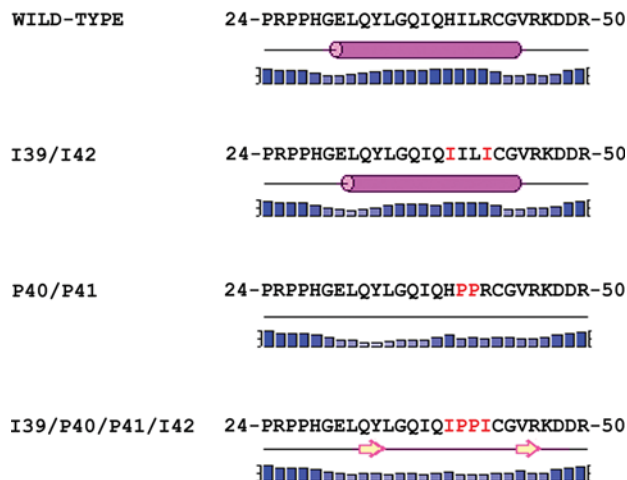

**Figure 5 Predicted impact of amino acid substitutions on the helical propensity of hA segment**

The helical propensity of the region spanning residues 24–50 of wild-type hTS and mutants I39/I42, P40/P41 and I39/P40/P41/I42 were determined using PSIPRED [27]. For each molecule, the amino acid sequence is shown; targeted substitutions within mutated segments are indicated in red. The predicted secondary structure is shown below each sequence; black lines indicate coiled regions, magenta cylinders indicate  $\alpha$ -helices and yellow arrows indicate  $\beta$ -strands. The blue bars at the bottom show the relative confidence for the predictions at each position along the sequence, with the height and depth of blue indicating greater confidence. The predictor accurately identified hA of wild-type hTS, known from X-ray crystallographic studies [4,5].

helical propensity of the hA segment in both N30–hA<sup>I/I</sup>–eGFP and in its wild-type counterpart N30–hA–eGFP. As seen in Figure 5, for both the wild-type and mutant segments, an  $\alpha$ -helical domain spanning residues 31–42, which is the precise location of hA as detected by X-ray crystallography [4,5], was predicted with high confidence for both segments. In contrast, loss of the helical conformation was predicted when proline residues were introduced at positions 40 and 41 (Figure 5). Thus, the secondary structure of hA is likely to be significantly disrupted by insertion of proline substitutions at positions 40 and 41.

With this information, we measured the half-life of polypeptide N30–hA<sup>I/P/P/I</sup>–eGFP, which is a derivative of N30–hA<sup>I/I</sup>–eGFP containing proline substitutions at sites 40 and 41 within hA (see Figure 1). As shown in Figure 6(A), N30–hA<sup>I/P/P/I</sup>–eGFP had a half-life  $>24$  h, indicating it to be significantly more stable than its parent, N30–hA<sup>I/I</sup>–eGFP. This provides strong verification of the notion that promotion of degradation by hA segment requires a helical conformation.

To assess the generality of this conclusion, we tested the requirement for  $\alpha$ -helix in a completely different system. We have shown that the N-terminal domain of the *Escherichia coli* lac repressor, which contains an HLH (helix-loop-helix) motif spanning residues 9–29, functions as a degron [9]. Deletion of the first helix of the HLH motif (residues 9–17) stabilizes the polypeptide [9], whereas deletion of the second (residues 22–29) has no effect (K. Barbour, unpublished work); thus, the first helix drives the region's degron activity. To test if an  $\alpha$ -helical conformation is

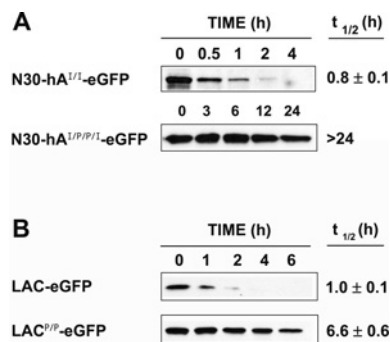

**Figure 6 Degron activity requires a helical segment**

The indicated plasmid constructs were stably transfected into cell line RJK88.13 and treated with CHX (see the text and Figure 1). Decreases in protein concentrations over time were monitored by Western blotting (see the Experimental section for details). A representative blot is shown for each construct. The half-lives ( $t_{1/2}$ ) are shown to the right of the corresponding blots, and are presented as means  $\pm$  S.D.

required, we introduced proline substitutions at residues 13 and 14 of the first helix, resulting in LAC<sup>P/P</sup>-eGFP (see Figure 1). PSIPRED correctly predicted the wild-type LAC region to have an  $\alpha$ -helical conformation spanning residues 9–17, which was abolished by insertion of proline at sites 13 and 14 (results not shown). Figure 6(B) shows that LAC<sup>P/P</sup>-eGFP exhibited a half-life of  $\sim 7$  h, which is significantly longer than the parental LAC-eGFP molecule. Thus, as with hA of hTS, full degron function requires maintenance of a helical conformation.

### Juxtaposition of the IDR and hA is not required for co-operative degron function

The hTS degron exerts its degradative function when placed at either the N-terminal or C-terminal end of the substrate [9]. Given its bipartite nature, it was of interest to ask if the two co-operating segments, i.e. the IDR and hA, must be juxtaposed. We generated and tested a fusion construct (denoted N30-eGFP-hA) having the IDR at the N-terminus and hA at the C-terminus (see Figure 1). As shown in Figure 7, N30-eGFP-hA had a half-life of 1.4 h, which is considerably shorter than that exhibited by the N30-hA-eGFP polypeptide. Thus, the two segments of the hTS degron co-operate even when placed at opposite ends of the target substrate. We also tested a protein (termed hA-eGFP-IDR; see Figure 1) having the opposite orientation, i.e. with hA at the N-terminus and the IDR at the C-terminus. Interestingly, hA-eGFP-N30 was very stable, exhibiting a half-life  $>24$  h (Figure 7). Thus, it may be that the ability of the two degron components to co-operate when separated is position-dependent, although further studies are necessary to verify this interpretation.

### The C-terminal end of TS contains a ‘cryptic’ degron

Previously, we observed that blocking the N-terminal amino group of hTS, either with a histidine-tag or by mutations that promote N- $\alpha$ -acetylation, results in a very stable polypeptide [8]. We interpreted this as indicating that initiation of proteasomal de-

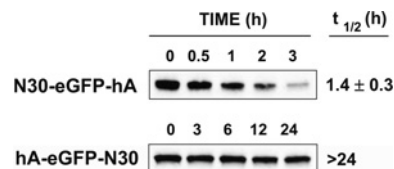

**Figure 7 The IDR and hA co-operate when physically separated**

Plasmid constructs were stably transfected into cell line RJK88.13 and treated with CHX (see the text and Figure 1). Decreases in protein concentrations over time were monitored by Western blotting (see the Experimental section for details). A representative blot is shown for each construct. The half-lives ( $t_{1/2}$ ) are shown to the right of the corresponding blots, and are presented as means  $\pm$  S.D.

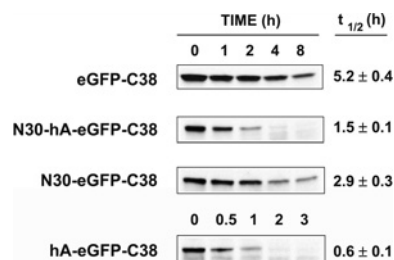

**Figure 8 A ‘cryptic’ degron at the C-terminus of hTS**

Plasmids expressing (see the text and Figure 1) were stably transfected into cell line RJK88.13 and treated with CHX. Decreases in protein concentrations over time were monitored by Western blotting (see the Experimental section for details). A representative blot is shown for each construct. The half-lives ( $t_{1/2}$ ) are shown to the right of the corresponding blots, and are presented as means  $\pm$  S.D.

gradation occurs at the N-terminal end, and proceeds in the  $N \rightarrow C$  direction [8]. Of interest was the finding that certain mutant hTS molecules (e.g. those with a P303L substitution) are stabilized by blocking the C-terminal end, suggesting that degradation of these mutant molecules may occur from the C-terminal end and proceed in a  $C \rightarrow N$  direction [8,10]. Thus, the C-terminal region of hTS may contain a ‘cryptic’ degron that is activated in certain mutant polypeptides.

To test whether the C-terminal domain of hTS functions as a degron, we generated a polypeptide, termed eGFP-C38, containing the C-terminal 88 amino acids of hTS (residues 276–313) appended to eGFP (see Figure 1). The region includes a short, two-stranded  $\beta$ -sheet formed from residues 277–282 and 295–300. Figure 8 shows that the half-life of this molecule was 5.2 h, indicating that the hTS domain promotes degradation of the reporter, perhaps to a greater extent than the N-terminal degron (see Figure 4). Ligation of the N-terminal degron (i.e. residues 1–45) to eGFP-C38 results in a polypeptide, denoted N30-hA-eGFP-C38 (see Figure 1), that has a half-life of 1.5 h, indicating it to be even more unstable than eGFP-C38 (Figure 8). Thus, the C-terminal region of hTS functions as a degron, the activity of which is enhanced by the presence of the N-terminal degron at the other end of the substrate.

To determine if one or the other of the two subdomains comprising the N-terminal degron enhances the activity of the C38

element, we analysed polypeptides containing either the IDR or hA, neither of which is active on its own, appended to eGFP–C38. Polypeptide N30–eGFP–C38 (see Figure 1) exhibited a half-life of 2.9 h (Figure 8), indicating that the IDR modestly destabilizes eGFP–C38. Polypeptide hA–eGFP–C38 (see Figure 1) had a very short half-life of 0.6 h (Figure 8), indicating that hA induces potent destabilization of the substrate. We conclude that both the IDR and hA element, which by themselves are inactive in promoting degradation, promote the degron activity of the C38 element.

## DISCUSSION

In earlier studies, we showed that the intracellular stability of TS is increased by the binding of inhibitory ligands [7], a finding that prompted an examination of the mechanism of TS degradation. We showed that proteolysis of the human enzyme (designated hTS) is carried out by the 26S proteasome, and occurs in a ubiquitin-independent manner. Furthermore, it is mediated by a portable, bipartite degron comprised of an IDR and an amphipathic  $\alpha$ -helix located at the enzyme's N-terminal end [8–11]. A striking characteristic of the IDR is the occurrence of extensive sequence divergence among mammalian species [11]. Despite a high rate of amino acid substitution during evolution, the IDR has maintained its disordered character and its role in degron function. Thus, it is overall structure (or lack thereof) that is critical to degradation [9]. The specific amino acid sequence is less important, so long as it does not promote order.

It is well-recognized that IDRs typically evolve more rapidly than ordered regions, resulting in greater extents of amino acid substitution [30–32]; however, the forces driving such high substitution rates, specifically the role of positive against negative selection, are not well defined. Our analysis showed that the mean ratio of rates of non-synonymous to synonymous substitutions among pairwise comparisons of TS polypeptides from a variety of mammalian species is about 8-fold higher for the IDR as compared with the rest of the polypeptide; however, the ratio is still significantly <1 (Supplementary Table 1). Thus, although the disordered domain is more tolerant of amino acid substitutions than is the remainder of the molecule, it is still subject to negative selection. This conclusion is corroborated by the use of codon-based methods of analysis, which showed that the fraction of negatively selected codons is significantly reduced in the IDR as compared with the body of the polypeptide, and that few, if any, codons within the IDR are positively selected. In all, positive Darwinian selection appears to play little if any role in the high extents of amino acid variation within the IDR of mammalian TS.

Neither the IDR nor hA on its own is capable of promoting degradation (Figure 4). Interestingly, degron activity does not require that the two components be juxtaposed, in that they maintain the ability to co-operate when the IDR is at the N-terminus and hA is at the C-terminus (Figure 7). It is of interest that degron activity

is lost when the two elements are in the opposite orientation, i.e. when the IDR is at the C-terminus and hA is at the N-terminus (Figure 7). This may indicate a position-dependency between the two segments when physically separated. However, other interpretations are possible. For example, it may be that when placed at the N-terminus, hA is blocked or modified in some fashion that inhibits its degradative role. The fact that the helical element promotes degradation of the newly identified 'cryptic' degron at the C-terminal end of TS (see Figure 8) suggests that it is functional. However, additional studies will be required to delineate whether or not the TS degron components do exhibit position-dependency when separated.

The 'cryptic' degron spanning residues 276–313 at the C-terminus of hTS (Figure 8) was predicted from the properties of certain mutant hTS molecules analysed in earlier studies [8,10]. This degron appears to be active only when large deletions or certain amino acid substitutions are introduced into the hTS polypeptide [8,10]. The region has a small  $\beta$ -sheet composed of two strands spanning residues 277–282 and 295–300. The importance of this structural element is unknown. The 'cryptic' degron may play a role in regulating hTS degradation under circumstances where the N-terminal degron is either blocked or inactivated. Definition of such circumstances and their physiological implications will require further studies.

It is formally possible that some of the unstable chimaeric proteins produced and examined in the present study have acquired a ubiquitin-dependent mode of degradation, resulting in shortened half-lives. We consider this unlikely, since we find no evidence of high-molecular-mass ubiquitinated isoforms in any of the Western blots we have analysed. This holds true even when cells were grown in the presence of the proteasome inhibitor MG132, which generally causes accumulation of ubiquitinated forms.

The requirement for disordered domains (and, in some cases, co-operating helical elements) may be a general theme among ubiquitin-independent substrates. Degradation of mammalian ODC is governed by an intrinsically disordered 37-residue region at the C-terminal end of the polypeptide [13,33]. Yeast ODC contains a disordered 45-residue domain at its N-terminal end that functions as a ubiquitin-independent degron and that is followed by a predicted  $\alpha$ -helix [14]. The ubiquitin-independent degron of Rpn4, which is 80 amino acids in length, is located at the molecule's N-terminus and is predicted to consist of a 15–20-residue disordered domain followed by a structured region [20]. Finally, analysis of apomyoglobin degradation in a purified system *in vitro* has shown that a disordered element in the middle of the polypeptide, in co-operation with helical segments located at the N-terminus, is required for proteolytic breakdown [19]. In all, these studies indicate that ubiquitin-independent degradation requires flexible, disordered regions.

Our finding that TS proteolysis requires both a disordered and an ordered segment is consistent with the so-called 'two-component' model of proteasomal function [34,35]. In this model, degradation is viewed as occurring in two phases: proteasome recognition and binding followed by initiation of polypeptide insertion into the proteolytic chamber. For ubiquitin-dependent substrates, the first phase (recognition/binding) is

mediated by covalently attached polyubiquitin moieties that recognize one or more subunits of the proteasomal complex [35–37]. For ubiquitin-independent substrates, residues within the target polypeptide chain are utilized [13]. The second phase (initiation) involves unfolding of the proteasome-bound substrate, ‘threading’ of the substrate through the pore that leads to the proteolytic chamber, and entry into the chamber itself, where proteolysis ensues [33,35]. These steps are typically governed by disordered segments that are often (although not always) located at one or the other end of the protein [33,37]. With regard to TS, the helical hA segment may be responsible for proteasome binding, whereas the IDR guides substrate unfolding and chamber entry. Specific amino acids within each domain (e.g. Arg<sup>10</sup>/Arg<sup>11</sup> within the IDR, His<sup>39</sup>/Arg<sup>42</sup> within hA) represent critical residues that mediate the respective functions of the degron sub-elements.

Co-operation between disordered and helical segments, such as in TS, has been observed for the PUP (prokaryotic ubiquitin-like protein) of actinobacteria. Similar to ubiquitin, PUP ligation to proteins targets them for degradation by a proteasome-like complex [38]. Detailed structural studies have shown that upon ligation to a target substrate, PUP forms what is essentially a ‘two-component’ degron in which a helical C-terminal region binds regulatory subunits of the proteasome, whereas a disordered N-terminal region governs initiation of chamber entry [39]. Sequence alignments indicate that the helix-forming region of the PUP degron is more conserved among bacterial species than is the disordered region [40]. Such differential rates of evolution for disordered against the ordered degron sub-regions was also observed for TS in the present study.

#### AUTHOR CONTRIBUTION

Karen Barbour and Franklin Berger designed the research plan and analysed data; Karen Barbour and Yang-Yang Xing carried out the experiments; Edsel Peña carried out the statistical analysis of the data; and Franklin Berger wrote and prepared the paper with the assistance of Karen Barbour.

#### FUNDING

This work was supported by the National Institutes of Health [grant number CA44013, RR017698].

## REFERENCES

- Berger, F. G. and Berger, S. H. (2006) Thymidylate synthase as a chemotherapeutic drug target: where are we after fifty years? *Cancer Biol. Ther.* **5**, 1238–1241.
- Carreras, C. W. and Santi, D. V. (1995) The catalytic mechanism and structure of thymidylate synthase. *Annu. Rev. Biochem.* **64**, 721–762.
- Hardy, L. W., Finer-Moore, J. S., Montfort, W. R., Jones, M. O., Santi, D. V. and Stroud, R. M. (1987) Atomic structure of thymidylate synthase: target for rational drug design. *Science* **235**, 448–455.
- Phan, J., Steadman, D. J., Koli, S., Ding, W. C., Minor, W., Dunlap, R. B., Berger, S. H. and Lebiada, L. (2001) Structure of human thymidylate synthase suggests advantages of chemotherapy with noncompetitive inhibitors. *J. Biol. Chem.* **276**, 14170–14177.
- Schiffer, C. A., Clifton, I. J., Davisson, V. J., Santi, D. V. and Stroud, R. M. (1995) Crystal structure of human thymidylate synthase: a structural mechanism for guiding substrates into the active site. *Biochemistry* **34**, 16279–16287.
- Sotelo-Mundo, R. R., Ciesla, J., Dzik, J. M., Rode, W., Maley, F., Maley, G. F., Hardy, L. W. and Montfort, W. R. (1999) Crystal structures of rat thymidylate synthase inhibited by Tomudex, a potent anticancer drug. *Biochemistry* **38**, 1087–1094.
- Kitchens, M. E., Forsthoefel, A. M., Rafique, Z., Spencer, H. T. and Berger, F. G. (1999) Ligand-mediated induction of thymidylate synthase occurs by enzyme stabilization. Implications for autoregulation of translation. *J. Biol. Chem.* **274**, 12544–12547.
- Pena, M. M., Xing, Y. Y., Koli, S. and Berger, F. G. (2006) Role of N-terminal residues in the ubiquitin-independent degradation of human thymidylate synthase. *Biochem. J.* **394**, 355–363.
- Melo, S. P., Barbour, K. W. and Berger, F. G. (2011) Cooperation between an intrinsically disordered region and a helical segment is required for ubiquitin-independent degradation by the proteasome. *J. Biol. Chem.* **286**, 36559–36567.
- Melo, S. P., Yoshida, A. and Berger, F. G. (2010) Functional dissection of the N-terminal degron of human thymidylate synthase. *Biochem. J.* **432**, 217–226.
- Pena, M. M., Melo, S. P., Xing, Y. Y., White, K., Barbour, K. W. and Berger, F. G. (2009) The intrinsically disordered N-terminal domain of thymidylate synthase targets the enzyme to the ubiquitin-independent proteasomal degradation pathway. *J. Biol. Chem.* **284**, 31597–31607.
- Glickman, M. H. and Ciechanover, A. (2002) The ubiquitin-proteasome proteolytic pathway: destruction for the sake of construction. *Physiol. Rev.* **82**, 373–428.
- Takeuchi, J., Chen, H., Hoyt, M. A. and Coffino, P. (2008) Structural elements of the ubiquitin-independent proteasome degron of ornithine decarboxylase. *Biochem. J.* **410**, 401–407.
- Godderz, D., Schafer, E., Palanimurugan, R. and Dohmen, R. J. (2011) The N-terminal unstructured domain of yeast ODC functions as a transplantable and replaceable ubiquitin-independent degron. *J. Mol. Biol.* **407**, 354–367.
- Chen, X., Barton, L. F., Chi, Y., Clurman, B. E. and Roberts, J. M. (2007) Ubiquitin-independent degradation of cell-cycle inhibitors by the REGgamma proteasome. *Mol. Cell* **26**, 843–852.
- Li, X., Amazit, L., Long, W., Lonard, D. M., Monaco, J. J. and O’Malley, B. W. (2007) Ubiquitin- and ATP-independent proteolytic turnover of p21 by the RE Ggamma-proteasome pathway. *Mol. Cell* **26**, 831–842.
- Truhlar, S. M., Mathes, E., Cervantes, C. F., Ghosh, G. and Komives, E. A. (2008) Pre-folding IκBα alters control of NF-κB signaling. *J. Mol. Biol.* **380**, 67–82.
- Mathes, E., Wang, L., Komives, E. and Ghosh, G. (2010) Flexible regions within IκBα create the ubiquitin-independent degradation signal. *J. Biol. Chem.* **285**, 32927–32936.
- Singh Gautam, A. K., Balakrishnan, S. and Venkatraman, P. (2012) Direct ubiquitin independent recognition and degradation of a folded protein by the eukaryotic proteasomes-origin of intrinsic degradation signals. *PLoS ONE* **7**, e34864.
- Ha, S. W., Ju, D. and Xie, Y. (2012) The N-terminal domain of Rpn4 serves as a portable ubiquitin-independent degron and is recognized by specific 19S RP subunits. *Biochem. Biophys. Res. Commun.* **419**, 226–231.
- Flicek, P., Amode, M. R., Barrell, D., Beal, K., Brent, S., Carvalho-Silva, D., Clapham, P., Coates, G., Fairley, S., Fitzgerald, S. et al. (2012) Ensembl 2012. *Nucleic Acids Res.* **40**, D84–D90.
- Goujon, M., McWilliam, H., Li, W., Valentin, F., Squizzato, S., Paern, J. and Lopez, R. (2010) A new bioinformatics analysis tools framework at EMBL-EBI. *Nucleic Acids Res.* **38**, W695–W699.



- 23 Larkin, M. A., Blackshields, G., Brown, N. P., Chenna, R., McGettigan, P. A., McWilliam, H., Valentin, F., Wallace, I. M., Wilm, A., Lopez, R. et al. (2007) Clustal W and Clustal X version 2.0. *Bioinformatics* **23**, 2947–2948
- 24 Nei, M. and Gojobori, T. (1986) Simple methods for estimating the numbers of synonymous and nonsynonymous nucleotide substitutions. *Mol. Biol. Evol.* **3**, 418–426
- 25 Ota, T. and Nei, M. (1994) Variance and covariances of the numbers of synonymous and nonsynonymous substitutions per site. *Mol. Biol. Evol.* **11**, 613–619
- 26 Kosakovsky, P., Pond, S. L. and Frost, S. D. (2005) Not so different after all: a comparison of methods for detecting amino acid sites under selection. *Mol. Biol. Evol.* **22**, 1208–1222
- 27 Jones, D. T. (1999) Protein secondary structure prediction based on position-specific scoring matrices. *J. Mol. Biol.* **292**, 195–202
- 28 Shaw, D., Berger, F. G. and Spencer, H. T. (2001) Retroviral expression of *Escherichia coli* thymidylate synthase cDNA confers high-level antifolate resistance to hematopoietic cells. *Hum. Gene Ther.* **12**, 51–59
- 29 Nussbaum, R. L., Walmsley, R. M., Lesko, J. G., Airhart, S. D. and Ledbetter, D. H. (1985) Thymidylate synthase-deficient Chinese hamster cells: a selection system for human chromosome 18 and experimental system for the study of thymidylate synthase regulation and fragile X expression. *Am. J. Hum. Genet.* **37**, 1192–1205
- 30 Brown, C. J., Johnson, A. K. and Daughdrill, G. W. (2010) Comparing models of evolution for ordered and disordered proteins. *Mol. Biol. Evol.* **27**, 609–621
- 31 Huntley, M. and Golding, G. B. (2000) Evolution of simple sequence in proteins. *J. Mol. Evol.* **51**, 131–140
- 32 Tompa, P. (2003) Intrinsically unstructured proteins evolve by repeat expansion. *Bioessays* **25**, 847–855
- 33 Takeuchi, J., Chen, H. and Coffino, P. (2007) Proteasome substrate degradation requires association plus extended peptide. *EMBO J.* **26**, 123–131
- 34 Inobe, T., Fishbain, S., Prakash, S. and Matouschek, A. (2011) Defining the geometry of the two-component proteasome degron. *Nat. Chem. Biol.* **7**, 161–167
- 35 Schrader, E. K., Harstad, K. G. and Matouschek, A. (2009) Targeting proteins for degradation. *Nat. Chem. Biol.* **5**, 815–822
- 36 Elsasser, S. and Finley, D. (2005) Delivery of ubiquitinated substrates to protein-unfolding machines. *Nat. Cell Biol.* **7**, 742–749
- 37 Prakash, S., Tian, L., Ratliff, K. S., Lehotzky, R. E. and Matouschek, A. (2004) An unstructured initiation site is required for efficient proteasome-mediated degradation. *Nat. Struct. Mol. Biol.* **11**, 830–837
- 38 Burns, K. E. and Darwin, K. H. (2010) Pupylation: a signal for proteasomal degradation in mycobacterium tuberculosis. *Subcell. Biochem.* **54**, 149–157
- 39 Wang, T., Darwin, K. H. and Li, H. (2010) Binding-induced folding of prokaryotic ubiquitin-like protein on the *Mycobacterium* proteasomal ATPase targets substrates for degradation. *Nat. Struct. Mol. Biol.* **17**, 1352–1357
- 40 Sutter, M., Striebel, F., Damberger, F. F., Allain, F. H. and Weber-Ban, E. (2009) A distinct structural region of the prokaryotic ubiquitin-like protein (PUP) is recognized by the N-terminal domain of the proteasomal ATPase Mpa. *FEBS Lett.* **583**, 3151–3157

---

Received 30 October 2012/20 November 2012; accepted 22 November 2012

---

Published as Immediate Publication 26 November 2012, doi 10.1042/BSR20120112

---

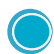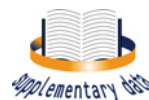

OPEN ACCESS

## SUPPLEMENTARY DATA

# Characterization of the bipartite degron that regulates ubiquitin-independent degradation of thymidylate synthase

Karen W. BARBOUR\*<sup>†</sup>, Yang-Yang XING\*<sup>†</sup>, Edsel A. PEÑA\*<sup>‡</sup> and Franklin G. BERGER\*<sup>†1</sup>

\*Center for Colon Cancer Research, University of South Carolina, Columbia, SC 29208, U.S.A., <sup>†</sup>Department of Biological Sciences, University of South Carolina, Columbia, SC 29208, U.S.A., and <sup>‡</sup>Department of Statistics, University of South Carolina, Columbia, SC 29208, U.S.A.

See the following pages for Supplementary Figure S1 and Supplementary Table S1.

<sup>1</sup> To whom correspondence should be addressed (e-mail [fgberger@mailbox.sc.edu](mailto:fgberger@mailbox.sc.edu)).

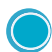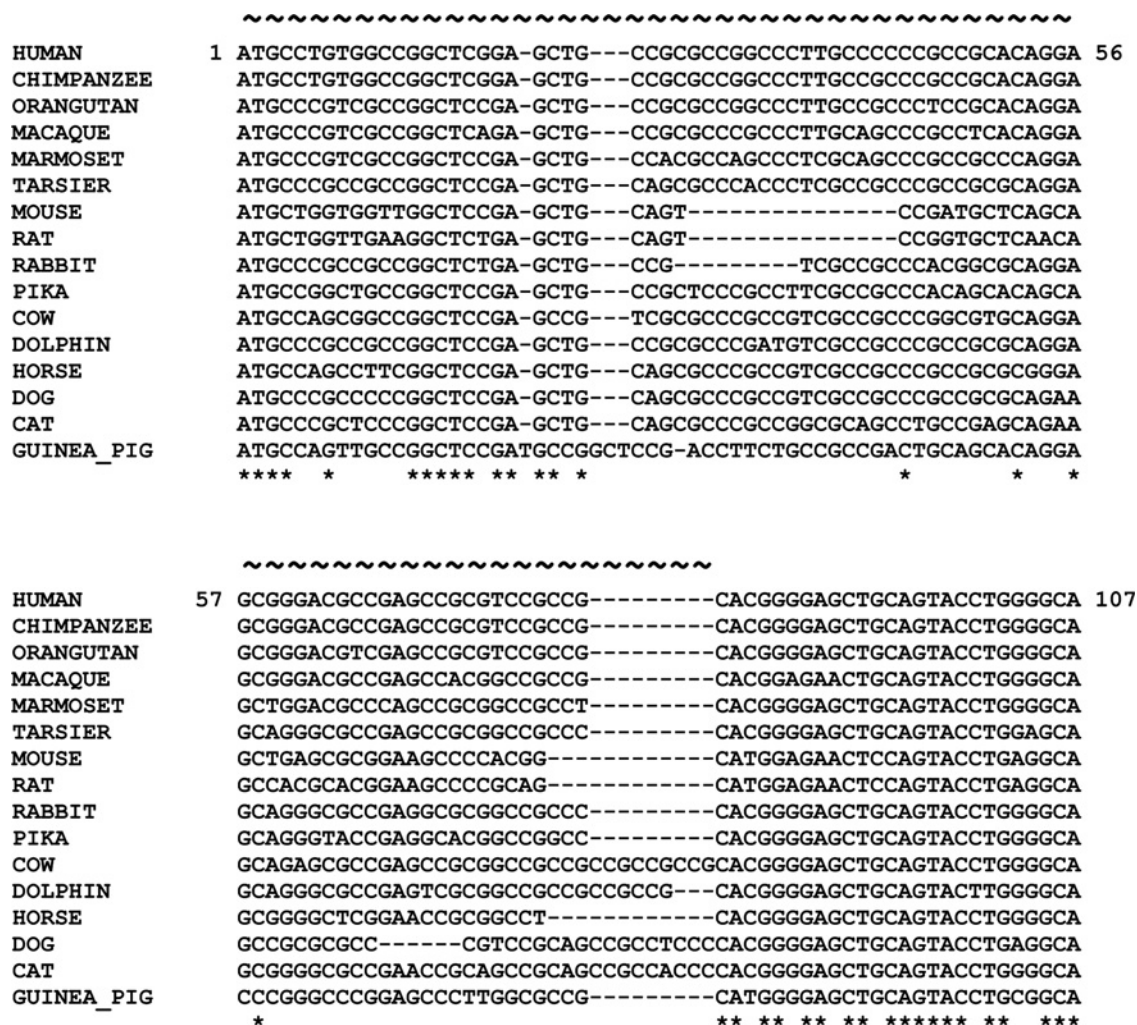

**Figure S1** Alignment of coding regions of mammalian TS mRNAs

The amino acid coding region of the TS mRNA from each of 16 species was downloaded and aligned (see the Experimental section for details). Numbers refer to the human transcript, with the initiation codon set as 1. Completely conserved nucleotides are marked by stars (\*). The region encoding the IDR, corresponding to nucleotides 1–81 of the hTS transcript, is indicated by a tilde (~).

|            |     |                                                               |     |
|------------|-----|---------------------------------------------------------------|-----|
| HUMAN      | 108 | GATCCAACACATCCTCCGCTGCGGCGTCAGGAAGGACGACCGCACGGGCACCGGCACCCT  | 167 |
| CHIMPANZEE |     | GATCGAACACATCCTCCGCTGCGGCGTCAGGAAGGACGACCGCACGGGCACCGGCACCCT  |     |
| ORANGUTAN  |     | GATCGAGCACATCCTCCGCTGCGGCGTCAGGAAGGACGACCGCACGGGCACCGGCACCCT  |     |
| MACAQUE    |     | GATCGAGCACATCCTCCGCTGCGGCGTCAGGAAGGACGACCGCACGGGCACCGGCACGCT  |     |
| MARMOSSET  |     | GATCGAGCACATCCTCCGCTGCGGCGTCAGGAAGGATGACCGCACGGGCACCGGCACCCT  |     |
| TARSIER    |     | GGTCGAGCACATCCTGCGCTGCGGCGTCCGGAAGGACGACCGCACAGGCGCCGGGACCCT  |     |
| MOUSE      |     | GGTGGAGCACATTTTGCCTGCGGCTTCAAGAAGGAGGACCGCACGGGCACCTGGCACCCT  |     |
| RAT        |     | GGTGGAGCACATTATGCGCTGCGGCTTCAAGAAGGAGGACCGCACGGGCACCTGGCACCCT |     |
| RABBIT     |     | GATCGAGCACATCCTGCGCTGCGGCTTCAAGAAGGAGGACCGCACGGGCACCGGCACCCT  |     |
| PIKA       |     | AATCGAGCAGATCCTGCGCTGCGGCTTTCGGAAGGAGGACCGCACGGGCACCGGCACCCT  |     |
| COW        |     | GATAGAACACATCCTCCGCTGCGGCTTCCGGAGGGATGACCGCACGGGCACCTGGCACCCT |     |
| DOLPHIN    |     | GATCGAGCACATTCTCCGCTGCGGCTTTCGGAAGGATGACCGCACAGGACCGGCACCCT   |     |
| HORSE      |     | GATTGAGCACATCCTGCGCTCCGGCTTCCGGAAGGAGGACCGCACGGGCACCGGCACCCT  |     |
| DOG        |     | GGTGGAGCACATCCTGAGCTGCGGGGCCCGGAAGCACGACCGCACGGGCACGGGCACGCT  |     |
| CAT        |     | AGTGGAGCACATCCTGCGCTGCGGGTTCAGGAAGGATGACCGCACCGGCACCGGCACGCT  |     |
| GUINEA_PIG |     | GGTGGAGCACATTCTGCGTAGCGGCTTCCACAAGGAGGACCGCACCGGCACCGGCACGCT  |     |
|            |     | * * * * *                                                     |     |
| HUMAN      | 168 | GTCGGTATTTCGGCATGCAGGCGCGCTACAGCCTGAGAGATGAATTCCTCTGCTGACAAC  | 227 |
| CHIMPANZEE |     | GTCGGTATTTCGGCATGCAGGCGCGCTACAGCCTGAGAGATGAATTCCTCTGCTGACAAC  |     |
| ORANGUTAN  |     | GTCGGTATTTCGGCATGCAGGCGCGCTACAGCCTGAGAGATGAATTCCTCTGCTGACAAC  |     |
| MACAQUE    |     | GTCGGTATTTCGGCATGCAGGCGCGCTACAGCCTGAGAGATGAATTCCTCTGCTGACAAC  |     |
| MARMOSSET  |     | GTCGGTGTTTGGCATGCAGGCGCGCTACAGCCTGAGAGATGAATTCCTCTGCTGACAAC   |     |
| TARSIER    |     | GTCGGTGTTTGCATGCGGGCCGCTACGACCTGAGAGGTGAATTCCTCTGCTGACAAC     |     |
| MOUSE      |     | GTCGGTGTTTCGGCATGCAGGCACGATACAGCCTGAGAGATGAATTCCTCTGCTCACAAC  |     |
| RAT        |     | GTCGGTGTTTCGGCATGCAGGCACGGTACAGCCTGAGAGATGAATTCCTCTGCTCACAAC  |     |
| RABBIT     |     | GTCGGTGTTTCGGCATGCAGGCGCGCTACAGCCTGAGAGATGAATTCCTCTGCTGACAAC  |     |
| PIKA       |     | GTCGGTGTTTCGGCATGCAGGCACGCTACAACCTGAGAGATGAATTCCTCTGCTGACAAC  |     |
| COW        |     | GTCGGTGTTTCGGCATGCAGGCGCGGTACAACCTGAGAGATGAATTCCTCTGCTGACAAC  |     |
| DOLPHIN    |     | GTCGGTGTTTCGGCATGCAGGCGCGCTACAGCCTGAGAGATGAATTCCTCTGCTGACAAC  |     |
| HORSE      |     | GTCGGTGTTTCGGCCTGCAGGCGCGCTACAACCTGAGAGATGAATTCCTCTGCTGACAAC  |     |
| DOG        |     | GTCGGTGTTTCGGCATGCAGGCGCGCTACAGCCTGAGAGATGAATTCCTCTGCTGACAAC  |     |
| CAT        |     | GTCGGTGTTTCGGCATGCAGGCGCGCTACAGCCTGAGAGATGAATTCCTTTACTGACAAC  |     |
| GUINEA_PIG |     | GTCTGTGTTTCGGTATGCAGGCGCGCTACAGCCTACGAGATCAATTCCTCTGCTGACGAC  |     |
|            |     | *** ** *                                                      |     |
| HUMAN      | 228 | CAAACGTGTGTTCTGGAAGGGTGTTTTGGAGGAGTTGCTGTGGTTTATCAAGGGATCCAC  | 287 |
| CHIMPANZEE |     | CAAACGTGTGTTCTGGAAGGGTGTTTTGGAGGAGTTGCTGTGGTTTATCAAGGGATCCAC  |     |
| ORANGUTAN  |     | CAAACGTGTGTTCTGGAAGGGTGTTTTGGAGGAGTTGCTGTGGTTTATCAAGGGATCCAC  |     |
| MACAQUE    |     | CAAACGTGTGTTCTGGAAGGGTGTTTTGGAGGAGTTGCTGTGGTTTATCAAGGGATCTAC  |     |
| MARMOSSET  |     | CAAACGTGTGTTCTGGAAGGGTGTTTTGGAGGAGTTGCTGTGGTTTATCAAGGGATCCAC  |     |
| TARSIER    |     | CAAGCGTGATTCTGGAAGGGTGTTTTGGAGGAGTTACTGTGGTTTATCAAGGGATCCAC   |     |
| MOUSE      |     | CAAACGAGTGTTCTGGAAGGGTGTTTTGGAGGAGTTGTTGTGGTTTATCAAGGGATCCAC  |     |
| RAT        |     | CAAACGAGTATTCTGGAAGGGTGTTTTGGAGGAGTTGTTGTGGTTTATTAAGGGCTCCAC  |     |
| RABBIT     |     | CAAACGTGTATTCTGGAAGGGTGTTTGGAGGAGTTGCTGTGGTTTATCAAGGGATCCAC   |     |
| PIKA       |     | CAAACGTGTATTCTGGAAGGGTGTTTGGAGGAGCTGCTGTGGTTTATCAAGGGATCCAC   |     |
| COW        |     | CAAACGTGTTTTCTGGAAGGGTGTTTTGGAGGAGTTGCTGTGGTTTATCAAGGGATCCAC  |     |
| DOLPHIN    |     | CAAACGTGTTTTCTGGAAGGGTGTTTTGGAGGAGTTGCTGTGGTTTATCAAGGGATCCAC  |     |
| HORSE      |     | CAAACGTGTTTTCTGGAAGGGTGTTTGGAGGAGTTGCTGTGGTTTATCAAGGGATCCAC   |     |
| DOG        |     | CAAACGTGTATTTTGGAGGGTGTTTTGGAGGAGTTGCTGTGGTTTATCAAGGGATCCAC   |     |
| CAT        |     | CAAGCGTGATTCTGGAAGGGTGTTTTGGAGGAGTTGCTGTGGTTTATCAAGGGATCTAC   |     |
| GUINEA_PIG |     | CAAGCGTGTTTTTGGAGGGTATTCTGGAGGAGCTGCTGTGGTTTATTAAGGGATCTAC    |     |
|            |     | *** ** *                                                      |     |

Figure S1 Continued



|            |     |                                                                |     |
|------------|-----|----------------------------------------------------------------|-----|
| HUMAN      | 288 | AAATGCTAAAGAGCTGTCTTCCAAGGGAGTGAAAATCTGGGATGCCAATGGATCCCGAGA   | 347 |
| CHIMPANZEE |     | AAATGCTAAAGAGCTGTCTTCCAAGGGAGTGAAAATCTGGGATGCCAATGGATCCCGAGA   |     |
| ORANGUTAN  |     | AAATGCTAAAGAGCTGTCTTCCAAGGGAGTGAAAATCTGGGATGCCAATGGATCCCGAGA   |     |
| MACAQUE    |     | AAATGCTAAAGAGCTGTCTTCCAAGGGAGTGAAAATCTGGGATGCCAATGGATCCCGAGA   |     |
| MARMOSET   |     | AAATGCTAAAGAGCTGTCTTCCAAGGGAGTGAAAATCTGGGATGCCAATGGATCCCGAGA   |     |
| TARSIER    |     | AAATGCTAAAGAGCTGTCTTCCAAGGGAGTGAAAATCTGGGATGCCAATGGATCCCGAGA   |     |
| MOUSE      |     | AAATGCTAAAGAAATTGTCTCTCAAAGGGAGTGAGAATCTGGGATGCCAATGGATCCCGAGA |     |
| RAT        |     | AAATGCTAAAGAACTGTCTCTCAAAGGGAGTGAGAATTTGGGATGCCAATGGGTCCCGAGA  |     |
| RABBIT     |     | AAATGCTAAAGAACTGTCTTCCAAGGGAGTGAAAATCTGGGATGCCAATGCATCCCGAGA   |     |
| PIKA       |     | AAATGCTAAAGAACTGTCTGCCAAGGGAGTGAAAATCTGGGATGCGAACGCTTCCCGAGA   |     |
| COW        |     | CAACGCTAAGGAACTCTCTTCCAAGGGAGTGAAAATTTGGGATGCCAATGGGTCCCGAGA   |     |
| DOLPHIN    |     | AAACGCTAAGGAGCTGTCTTCCAAGGGAGTGAAAATCTGGGATGCTAATGGGTCCCGAGA   |     |
| HORSE      |     | AAATGCTAATGAACTGTCTTGCAAGGGAGTGAAAATCTGGGATGCCAATGGGTCCCGAGA   |     |
| DOG        |     | AAACGCTAAGGAACTGTCTTCCAGGGGAGTGAAAATCTGGGATGCCAATGGGTCTCGAGA   |     |
| CAT        |     | AAACGCTAAGGAACTGTCTATCCAAGGGAGTGAAAATCTGGGATGCCAATGGGTCCCGAAA  |     |
| GUINEA_PIG |     | AAATGCCAAAGAACTGTCTATCCAAGGGCGTGAAAATTTGGGATGCCAATGGGTCTCGAGA  |     |
|            |     | ** ** *                                                        |     |
| HUMAN      | 348 | CTTTTGGACAGCCTGGGATTCTCCACCAGAGAAGAAGGGGACTTGGGCCAGTTTATGG     | 407 |
| CHIMPANZEE |     | CTTTTGGACAGCCTGGGATTCTCCACCAGAGAAGAAGGGGACTTGGGCCAGTTTATGG     |     |
| ORANGUTAN  |     | CTTTTGGACAGCCTGGGATTCTCCACCAGAGAAGAAGGGGACTTGGGCCAGTTTATGG     |     |
| MACAQUE    |     | CTTTTGGACAGCCTGGGGTTCTCCGCCAGAGAAGAAGGGGACTTGGGTCCAGTTTATGG    |     |
| MARMOSET   |     | CTTTCTGGATAGCTTGGGATTTTCCGCCAGAGAAGAAGGGGATTTGGGCCAGTTTATGG    |     |
| TARSIER    |     | CTTTCTGGACTGCTTAGGATTCTCCACCAGAGAAGAAGGAGATTTGGGCCCTGTCTATGG   |     |
| MOUSE      |     | TTTTCTGGACAGCTTGGGATTTTCTGCCCGACAGGAAGGGGACCTGGGCCAGTTTATGG    |     |
| RAT        |     | CTTTTGGACAGCTTGGGATTCTCTGCCCGACAGGAAGGAGACCTGGGCCAGTTTATGG     |     |
| RABBIT     |     | CTTTTGGACAGCCTGGGATTCTCCACCAGACAAGAAGGGGACCTGGGTCCAGTTTATGG    |     |
| PIKA       |     | ATTTCTGGACAGCCTTGGATTCTCAACCAGAGAGGAGGGGACCTGGGTCCAGTTTATGG    |     |
| COW        |     | CTTCTTGGATGGCCTGGGCTTCTCCGACAGAGCTGAAGGGGATTTAGGCCAGTTTATGG    |     |
| DOLPHIN    |     | CTTCTTGGACAGCCTGGGATTCTCCACCAGACAGAAGGGGATTAGGCCAGTTTATGG      |     |
| HORSE      |     | CTTCTTGGACAGCCTGGGATTCTCCGCCAGAGAAGAAGGGGATTAGGCCAGTTTACGG     |     |
| DOG        |     | CTTTTGGACAGCCTGGGATTCTGCCAACCAGAGAAGAAGGGGATTAGGCCCAATTTATGG   |     |
| CAT        |     | CTTCTTGGACAGCCTAGGATTCTCCAACAGAGAAGAAGGGGATTAGGCCAGTTTATGG     |     |
| GUINEA_PIG |     | CTTCTTGGACAGCCTGGGGTTTTCTAGCCGCCAGGAAGGGGACCTGGGCCCATTTATGG    |     |
|            |     | ** **** ** *                                                   |     |
| HUMAN      | 408 | CTTCAGTGGAGGCATTTTGGGGCAGAATACAGAGATATGGAATCAGATTATTCAGGACA    | 467 |
| CHIMPANZEE |     | CTTCAGTGGAGGCATTTTGGGGCAGAATACAGAGATATGGAATCAGATTATTCAGGACA    |     |
| ORANGUTAN  |     | CTTCAGTGGAGGCATTTTGGGGCAGAATACAGAGATATGGAATCAGATTATTCAGGACA    |     |
| MACAQUE    |     | CTTCAGTGGAGGCATTTTGGGGCAGAATACAGAGATATGGAATCAGATTATTCAGGACA    |     |
| MARMOSET   |     | CTTCAGTGGAGGCATTTTGGGGCAGAATACAGAGATATGGAATCAGATTATTCAGGACA    |     |
| TARSIER    |     | CTTCCAATGGAGGCATTTTGGGGCAGAATACAAAGATATGAATCAGATTATTCAGGTCA    |     |
| MOUSE      |     | TTTCCAATGGAGGCATTTTGGAGCAGAGTACAAAGATATGGATTAGATTACTCGGGACA    |     |
| RAT        |     | ATTCAGTGGAGACATTTTGGAGCAGACTACAAAGATATGGATTAGATTACTCGGGTCA     |     |
| RABBIT     |     | CTTCAGTGGAGGCATTTTGGTGCAGAATACAAAGATAAGGACTCAGATTATTCAGGTCA    |     |
| PIKA       |     | CTTCAGTGGAGGCATTTTGGGGCAGAATACAAAGATAAAGATTCTGATTACTCCGGCCA    |     |
| COW        |     | CTTCCAGTGGAGGCATTTTGGGGCTGAATACAAAGATATGGATTAGATTACTCAGGTCA    |     |
| DOLPHIN    |     | CTTTCAGTGGAGGCATTTTGGGGCCGAATACAAAGAGATGGATTAGATTATTCAGATAA    |     |
| HORSE      |     | CTTTCAGTGGAGGCATTTTGGGGCAGAATACAAAGATATGGATTAGATTATTCAGGTCA    |     |
| DOG        |     | CTTTCAGTGGAGGCATTTTGGGGCAGAATACAAAGATAAGGATTAGATTATTCAGGTCA    |     |
| CAT        |     | CTTTCAGTGGAGGCATTTTGGGGCAGAATACAAAGATAAGGATTAGATTATTCAGGTCA    |     |
| GUINEA_PIG |     | CTTCCAGTGGAGGCATTTTGGGGCTAGTACAAAGATATGGATTAGATTACTCAGGTCA     |     |
|            |     | ** ** *                                                        |     |

**Figure S1 Continued**

|            |     |                                                                  |     |
|------------|-----|------------------------------------------------------------------|-----|
| HUMAN      | 468 | GGGAGTTGACCAACTGCAAAGAGTGATTGACACCATCAAAACCAACCCGTGACGACAGAAG    | 527 |
| CHIMPANZEE |     | GGGAGTTGACCAGCTGCAAAGAGTGATTGACACCATCAAATCCAACCCGTGACGACAGAAG    |     |
| ORANGUTAN  |     | GGGAGTTGACCAACTGCAAAGAGTGATTGACACCATCAAAACGAACCCGTGACGACAGAAG    |     |
| MACAQUE    |     | GGGAGTTGACCAACTACAAAGAGTGATTGACACCATCAAAACCAACCCGTGACGACAGAAG    |     |
| MARMOSSET  |     | AGGAGTTGACCAACTGCAAAGAGTGATTGACACCATCAAAACCAACCCGTGATGACAGAAG    |     |
| TARSIER    |     | AGGAGTTGACCAGCTCCAAAAGGTGATTGACACCATCAAAACCAACCCGTGATGACAGAAG    |     |
| MOUSE      |     | AGGAGTAGACCAGCTGCAAAAAGTGATTGACACCATCAAAACCAACCCGTGATGACAGAAG    |     |
| RAT        |     | AGGAGTAGACCAGCTGCAAAAAGTGATTGACACCATCAAAACCAACCCCGATGACAGAAG     |     |
| RABBIT     |     | AGGAGTAGACCAACTGCAGAAGGTGATCGATACCATCAAAACCAACCCGTGATGACAGAAG    |     |
| PIKA       |     | AGGAGTAGACCAGCTGCAAAAAGTGATCGATACCATCAAAACCAACCCGTGATGACCGCAG    |     |
| COW        |     | AGGAGTAGATCAACTGCAAAAAGTGATCGACACAATCAAAACCAACCCTAACGACAGAAG     |     |
| DOLPHIN    |     | AGGAGTAGATCAACTGCAAAAAGTGATTGACACAATCAAAACCAACCCGTGACGACAGAAG    |     |
| HORSE      |     | AGGAGTAGACCAACTGCAAAAAGTGATTAACACAATCAAAACCAACCCGTGACGACAGAAG    |     |
| DOG        |     | AGGAGTCGACCAGCTGCAAAAAGTGATTGACACAATCAAAACCAACCCGTGACGACAGAAG    |     |
| CAT        |     | AGGAGTAGATCAACTGCAAAAAGGTGATTGACACAATCAAAACCAACCCCAATGACAGAAG    |     |
| GUINEA_PIG |     | AGGAGTTGACCAGCTGCAGAAAGTGATTGACACCATCAAAACCAACCCGTGATGACAGAAG    |     |
|            |     | ***** ** ** ** ** ***** * ** ***** * ***** * ** *                |     |
| HUMAN      | 528 | AATCATCATGTGCGCTTGAATCCAAGAGATCTTCCTCTGATGGCGCTGCCTCCATGCCA      | 587 |
| CHIMPANZEE |     | AATCATCATGTGCGCTTGAATCCAAGAGATCTTCCTCTGATGGCGCTGCCTCCATGCCA      |     |
| ORANGUTAN  |     | AATCATCATGTGCGCTTGAATCCAAGAGATCTTCCTCTGATGGCGCTGCCTCCATGCCA      |     |
| MACAQUE    |     | AATCATCATGTGTGCTTGAATCCAAGAGATCTTCCTCTGATGGCACTGCCTCCATGCCA      |     |
| MARMOSSET  |     | AATCATCATGTGCGCTTGAATCCAAGAGATCTTCCTCTGATGGCGCTGCCTCCATGCCA      |     |
| TARSIER    |     | GATCATCATGTGTGCTTGAATCCAAGAGATCTTCCTCTGATGGCGCTGCCTCCATGCCA      |     |
| MOUSE      |     | AATCATCATGTGTGCTTGAACCCAAAAGATCTTCCCTCTGATGGCACTGCCTCCCTGCCA     |     |
| RAT        |     | AATCATCATGTGTGCTTGAACCCAAAAGATCTTCCCTCTGATGGCACTGCCTCCCTGCCA     |     |
| RABBIT     |     | AATCATCATGTGTGCTTGAATCCCAAAGACCTTCTCTGATGGCGCTGCCCCGTGCCA        |     |
| PIKA       |     | AATCATCATGTGTGCTTGAATCCTAAAGACCTTCTCTGATGGCCCTGCCCCCATGCCA       |     |
| COW        |     | AATCATCCTGTGTGCTTGAATCCAAGAGATCTGCCTCTCATGGCCCTCCCCCATGCCA       |     |
| DOLPHIN    |     | AATCATCCTGTGTGCTTGAATCCAAGAGATGTCCCTCTCATGGCCCTACCCCGTGCCA       |     |
| HORSE      |     | AATCATCCTGTGTGCTTGAATCCAAGAGATCTTCCTCTCATGGCTCTGCCTCCCTGCCA      |     |
| DOG        |     | AATTATTCTGTGTGTTTGAATCCAAGAGATCTTCCTCTGATGGCCCTACCTCCGTGCCA      |     |
| CAT        |     | AATCATCCTGTGTGTTTGAATCCAAGAGATCTTCCTCTGATGGCCCTGCCTCCGTGCCA      |     |
| GUINEA_PIG |     | AATTATCATGTGTGCTTGAACCCGAAAGATCTTCCTCTGATGGCGCTGCCTCCCTGTCA      |     |
|            |     | ** ** ***** * ***** ** * ** * ** * ***** ** ** ** **             |     |
| HUMAN      | 588 | TGCCCTCTGCCAGTTCTATGTGGTGAACAGTGAGCTGTCCTGCCAGCTGTACCAGAGATC     | 647 |
| CHIMPANZEE |     | TGCCCTCTGCCAGTTCTATGTGGTGAACAGTGAGCTGTCCTGCCAGCTGTACCAGAGATC     |     |
| ORANGUTAN  |     | TGCCCTCTGCCAGTTCTATGTGGTGAACAGTGAGCTGTCCTGCCAGCTGTACCAGAGATC     |     |
| MACAQUE    |     | TGCTCTCTGCCAGTTCTATGTGGTGAACAGTGAGCTGTCCTGCCAGCTGTACCAGAGATC     |     |
| MARMOSSET  |     | TGCCCTCTGCCAGTTCTATGTGGTGAACGGTGAGCTGTCCTGCCAGCTGTACCAGAGATC     |     |
| TARSIER    |     | TGCCCTCTGCCAGTTCTACGTGGTGAACGGTGAGCTGTCCTGCCAGCTGTACCAGAGGTC     |     |
| MOUSE      |     | TGCCCTCTGTCAATTTATGTGGTGAATGGGGAAGTGTCTTGCCAGCTTTACCAGAGGTC      |     |
| RAT        |     | TGCCCTCTGTCAATTTATGTGGTGAATGGGGAGCTGTCTTGCCAGCTTTACCAGCGGTC      |     |
| RABBIT     |     | TGCCCTCTGCCAGTTCTACGTGGTGAATGGGGAGCTGTCCTGCCAGCTGTACCAGAGGTC     |     |
| PIKA       |     | TGCTCTCTGCCAGTTCTACGTAGTGAACGGCGAGCTGTCCTGCCAGTTGTACCAGAGGTC     |     |
| COW        |     | CGCCCTCTGCCAGTTCTACGTGGTGAATGGGGAGTTGTCCTGCCAGTTGTACCAGCGGTC     |     |
| DOLPHIN    |     | TGCCCTTTGCCAGTTCTACGTGGTGAACGGTGAGCTGTCCTGCCAGCTGTACCAGAGGTC     |     |
| HORSE      |     | TGCCCTCTGCCAGTTCTACGTGGTGAACGGTGAGCTGTCCTGCCAGCTGTACCAGAGATC     |     |
| DOG        |     | TGCCCTCTGCCAGTTCTATGTGGTGAACGGTGAGCTGTCCTGCCAGCTATACCAGAGGTC     |     |
| CAT        |     | TGCTCTTTGCCAGTTCTACGTGGTGAATGGTGAAGTGTCTGTCCTGCCAGCTGTACCAGAGGTC |     |
| GUINEA_PIG |     | CACCCCTCTGCCAGTTCTACGTGGTGAACGGGGAATTGTCTGTCAGCTGTACCAGCGCTC     |     |
|            |     | * ** ** ** ** ***** * ** ***** ** ** * ***** * **                |     |

Figure S1 Continued



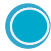

HUMAN 648 GGGAGACATGGGCCTCGGTGTGCCTTTCAACATCGCCAGCTACGCCCTGCTCACGTACAT 707  
 CHIMPANZEE GGGAGACATGGGCCTCGGTGTGCCTTTCAACATCGCCAGCTACGCCCTGCTCACGTACAT  
 ORANGUTAN GGGAGACATGGGCCTAGGTGTGCCTTTCAACATCGCCAGCTACGCCCTGCTCACGTACAT  
 MACAQUE GGGAGACATGGGCCTAGGTGTGCCTTTCAACATCGCCAGCTACGCCCTGCTCACCTACAT  
 MARMOSET GGGAGACATGGGCCTAGGTGTGCCTTTCAACATCGCCAGCTACGCCCTGCTCACATACAT  
 TARSIER AGGAGACATGGGCCTGGGTGTACCTTTCAACATCGCCAGCTATGCCCTGCTCACATACAT  
 COW GGGGGACATGGGCCTGGGTGTGCCCTTCAACATTGCCAGCTACGCCCTGCTCACCTACAT  
 MOUSE AGGAGATATGGGTCTGGGCGTGCCCTTCAACATTGCCAGCTATGCTCTGCTCACCTACAT  
 RAT AGGAGATATGGGTCTGGGCGTGCCCTTCAACATTGCCAGCTATGCTCTGCTGACCTACAT  
 RABBIT GGGAGACATGGGCCTGGGCGTGCCCTTCAACATCGCCAGCTATGCCCTGCTCACCTACAT  
 PIKA GGGAGACATGGGCCTGGGCGTGCCCTTCAACATTGCCAGCTACGCCCTGCTCACCTACAT  
 DOLPHIN AGGAGACATGGGCCTGGGTGTGCCCTTTAACATCGCCAGCTACGCCCTGCTCACCTACAT  
 HORSE GGGAGACATGGGCCTGGGTGTGCCCTTCAACATTGCCAGCTACGCCCTGCTCACCTACAT  
 DOG AGGAGACATGGGCCTGGGCGTGCCCTTCAACATCGCCAGCTACGCCCTGCTCACCTACAT  
 CAT AGGAGACATGGGCCTGGGTGTACCTTTCAACATCGCCAGCTACTCCCTGCTCACCTACAT  
 GUINEA\_PIG TGGGGACATGGGCCTGGGCGTGCCCTTCAACATTGCCAGCTACGCCCTGCTCACCTACAT  
 \* \* \* \* \*

HUMAN 708 GATTGCGCACATCACGGGCCTGAAGCCAGGTGACTTTATACACACTTTGGGAGATGCACA 767  
 CHIMPANZEE GATTGCGCACATCACGGGCCTGAAGCCAGGTGACTTTATACACACTTTGGGAGATGCACA  
 ORANGUTAN GATTGCGCACATCACGGGCCTGAAGCCAGGTGACTTTATACACACTTTGGGAGATGCACA  
 MACAQUE GATTGCGCACATCACGGGCCTGAAGCCAGGTGATTTTGTACACACTTTGGGAGATGCACA  
 MARMOSET GATCGCGCACATCACGGGCCTGAAGCCAGGTGACTTTGTACATACTTTGGGAGATGCACA  
 TARSIER GATCGCACACATCACAGGCCTGAAGCCAGGTGACTTTGTACATACTTTGGGAGATGCACA  
 MOUSE GATTGCACATATCACAGGCCTGCAGCCAGGTGATTTTGTCCACACTTTGGGAGATGCACA  
 RAT GATTGCACATATCACGGGCCTGCAGCCGGGTGATTTTGTCCATACTTTGGGAGATGCACA  
 RABBIT GATCGCGCACGTACCGGCCTGAAGCCAGGTGATTTTGTACATACTTTGGGAGATGCTCA  
 PIKA GATTGCGCATGTCACTGGACTGAAGCCAGGTGACTTTGTACACACTCTGGGAGATGCACA  
 COW GATCGCACACATCACGGACCTGAAGCCAGGTGACTTCGTGCACACTCTGGGAGATGCACA  
 DOLPHIN GATCGCACACATCACGGGCCTGAAGCCAGGTGACTTTGTACACACTTTGGGAGATGCACA  
 HORSE GATCGCACACATCACGGGCCTGAAGCCGGGTGACTTTGTGCACACTTTGGGAGATGCACA  
 DOG GATCGCACACATCACAGGCCTGAAGCCAGGTGACTTCATACATACTTTGGGAGATGCGCA  
 CAT GATCGCACACATCACAGGCCTGAAGCCAGGTGACTTCATACATACTTTGGGAGATGCGCA  
 GUINEA\_PIG GATTGCGCACGTACCGGCCTGCAGCCAGGTGACTTTGTGCATACACTGGGAGACGCACA  
 \* \* \* \* \*

HUMAN 768 TATTTACCTGAATCACATCGAGCCACTGAAAATTCAGCTTCAGCGAGAACCAGACCTTT 827  
 CHIMPANZEE TATTTACCTGAATCACATCGAGCCACTGAAAATTCAGCTTCAGCGAGAACCAGACCTTT  
 ORANGUTAN TATTTACCTGAATCACATTGAGCCACTGAAAATTCAGCTTCAGCGAGAACCAGACCTTT  
 MACAQUE TATTTACCTGAATCACATCGAGCCACTGAAAATTCAGCTTCAGCGAGAACCAGACCTTT  
 MARMOSET TATTTACCTGAATCACATCGAGATTTTAAAGTTACTCTTCAGCGAGAACCAGACCTTT  
 TARSIER TATTTACCTGAATCACATTGAGCCACTGAAAATTCAGCTTCAGAGAGAACCAAGACCTTT  
 MOUSE TATTTACCTGAATCATATAGAGCCGCTGAAAATTCAGCTACAGCGAGAACCAAGACCTTT  
 RAT CATTTATCTGAATCATATTGAGCCACTGAAAATTCAGCTACAGCGAGAACCAAGACCTTT  
 RABBIT TATTTACCTGAACCACATTGAGCCTCTGAAAATTCAGCTTCAGCGAGAACCAAGACCTTT  
 PIKA TGTTTACCTGAATCACATCGAGCCACTCAAAGTGCAGCTTCAACGAGAGCCAAGACCTTT  
 COW CATTTACCTGAATCACATCGAGCCACTGAAAATTCAGCTGCAGCGAGAACCAAGGCCTTT  
 DOLPHIN CATTTACCTGAATCACATTGAGCCGCTGAAAATTCAGCTTCAGCGAGAACCAAGGCCTTT  
 HORSE TATTTACCTGAATCACATTGACCCGCTGAAAACGCAGCTTCAGCGAGAACCAAGGCCTTT  
 DOG TATTTACCTGAATCACATTGAGCCGCTGAAAATACAGCTGCAGCGAGAACCAAGGCCTTT  
 CAT TATTTACCTGAATCACATTGAACCGCTAAAAATGCAGCTCCAGCGAGAACCAAGGCCTTT  
 GUINEA\_PIG CATTTACCTGAATCACATTGAGCCGCTGAAAATTCAGCTTCAACGAGAACCAAGACCTTT  
 \* \* \* \* \*

Figure S1 Continued

Downloaded from <http://port.silverchair.com/biosciencereparticle-pdf/33/1/e00015/475741/bsi0333e015.pdf> by guest on 10 April 2024

© 2013 The Author(s) This is an Open Access article distributed under the terms of the Creative Commons Attribution Non-Commercial Licence (<http://creativecommons.org/licenses/by-nc/2.5/>) which permits unrestricted non-commercial use, distribution and reproduction in any medium, provided the original work is properly cited



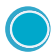

**Table S1 Synonymous ( $d_s$ ) and nonsynonymous ( $d_N$ ) nucleotide substitutions for the IDR and the body of the TS polypeptide**  
 Values for each of the 120 pairwise comparisons among 16 mammalian species were determined, and  $d_N/d_s$  ratios were calculated.

| Species 1  | Species 2  | IDR    |        |           | Body   |        |           |
|------------|------------|--------|--------|-----------|--------|--------|-----------|
|            |            | $d_N$  | $d_s$  | $d_N/d_s$ | $d_N$  | $d_s$  | $d_N/d_s$ |
| Human      | Chimpanzee | 0.0000 | 0.0441 | 0.0000    | 0.0045 | 0.0159 | 0.2830    |
|            | Orang-utan | 0.0355 | 0.1946 | 0.1824    | 0.0030 | 0.0321 | 0.0935    |
|            | Macaque    | 0.0629 | 0.2880 | 0.2184    | 0.0060 | 0.0948 | 0.0633    |
|            | Marmoset   | 0.1011 | 0.4321 | 0.2340    | 0.0205 | 0.1341 | 0.1529    |
|            | Tarsier    | 0.1113 | 0.4674 | 0.2381    | 0.0290 | 0.2979 | 0.0973    |
|            | Rabbit     | 0.1257 | 0.5646 | 0.2226    | 0.0267 | 0.3083 | 0.0866    |
|            | Pika       | 0.2201 | 0.6355 | 0.3463    | 0.0354 | 0.4987 | 0.0710    |
|            | Cow        | 0.1953 | 0.3235 | 0.6037    | 0.0361 | 0.4854 | 0.0744    |
|            | Dolphin    | 0.1590 | 0.3699 | 0.4298    | 0.0236 | 0.3595 | 0.0656    |
|            | Horse      | 0.1833 | 0.6655 | 0.2754    | 0.0386 | 0.2948 | 0.1309    |
|            | Dog        | 0.2150 | 0.3490 | 0.6160    | 0.0299 | 0.3998 | 0.0748    |
|            | Cat        | 0.2609 | 0.4975 | 0.5244    | 0.0306 | 0.4741 | 0.0645    |
|            | Mouse      | 0.3041 | 1.0397 | 0.2925    | 0.0321 | 0.5807 | 0.0553    |
|            | Rat        | 0.3536 | 2.8876 | 0.1225    | 0.0329 | 0.6567 | 0.0501    |
|            | Guinea pig | 0.3908 | 1.1119 | 0.3515    | 0.0571 | 0.6529 | 0.0875    |
| Chimpanzee | Orang-utan | 0.0355 | 0.1410 | 0.2518    | 0.0015 | 0.0267 | 0.0562    |
|            | Macaque    | 0.0536 | 0.2567 | 0.2088    | 0.0045 | 0.1009 | 0.0446    |
|            | Marmoset   | 0.0913 | 0.3941 | 0.2317    | 0.0190 | 0.1405 | 0.1352    |
|            | Tarsier    | 0.1113 | 0.3904 | 0.2851    | 0.0275 | 0.2905 | 0.0947    |
|            | Rabbit     | 0.1257 | 0.4661 | 0.2697    | 0.0252 | 0.3008 | 0.0838    |
|            | Pika       | 0.2201 | 0.5416 | 0.4064    | 0.0338 | 0.4695 | 0.0720    |
|            | Cow        | 0.1953 | 0.2590 | 0.7541    | 0.0345 | 0.4860 | 0.0710    |
|            | Dolphin    | 0.1590 | 0.3014 | 0.5275    | 0.0220 | 0.3599 | 0.0611    |
|            | Horse      | 0.1833 | 0.5653 | 0.3243    | 0.0370 | 0.2874 | 0.1287    |
|            | Dog        | 0.2150 | 0.2784 | 0.7723    | 0.0314 | 0.3827 | 0.0820    |
|            | Cat        | 0.2490 | 0.4546 | 0.5477    | 0.0321 | 0.4747 | 0.0676    |
|            | Mouse      | 0.3041 | 1.0397 | 0.2925    | 0.0306 | 0.5480 | 0.0558    |
|            | Rat        | 0.3536 | 2.8876 | 0.1225    | 0.0345 | 0.6208 | 0.0556    |
|            | Guinea pig | 0.3908 | 0.9414 | 0.4151    | 0.0554 | 0.6176 | 0.0897    |
| Orang-utan | Macaque    | 0.0916 | 0.1433 | 0.6392    | 0.0030 | 0.0948 | 0.0316    |
|            | Marmoset   | 0.1312 | 0.1995 | 0.6576    | 0.0175 | 0.1341 | 0.1305    |
|            | Tarsier    | 0.1524 | 0.1979 | 0.7701    | 0.0259 | 0.2902 | 0.0892    |
|            | Rabbit     | 0.1489 | 0.3010 | 0.4947    | 0.0236 | 0.2851 | 0.0828    |
|            | Pika       | 0.2437 | 0.4582 | 0.5319    | 0.0322 | 0.4886 | 0.0659    |
|            | Cow        | 0.2413 | 0.2590 | 0.9317    | 0.0330 | 0.5056 | 0.0653    |
|            | Dolphin    | 0.2027 | 0.1270 | 1.5961    | 0.0205 | 0.3427 | 0.0598    |
|            | Horse      | 0.2351 | 0.3856 | 0.6097    | 0.0354 | 0.2721 | 0.1301    |
|            | Dog        | 0.2665 | 0.0993 | 2.6838    | 0.0299 | 0.3823 | 0.0782    |
|            | Cat        | 0.2978 | 0.3041 | 0.9793    | 0.0306 | 0.4546 | 0.0673    |
|            | Mouse      | 0.3756 | 1.0397 | 0.3613    | 0.0290 | 0.5582 | 0.0520    |
|            | Rat        | 0.4363 | 2.5045 | 0.1742    | 0.0329 | 0.6199 | 0.0531    |
|            | Guinea pig | 0.4513 | 0.8025 | 0.5624    | 0.0538 | 0.6168 | 0.0872    |
| Macaque    | Marmoset   | 0.0907 | 0.2635 | 0.3442    | 0.0144 | 0.1992 | 0.0723    |
|            | Tarsier    | 0.1308 | 0.2612 | 0.5008    | 0.0259 | 0.3457 | 0.0749    |
|            | Rabbit     | 0.1722 | 0.3041 | 0.5663    | 0.0236 | 0.3239 | 0.0729    |
|            | Pika       | 0.2421 | 0.3904 | 0.6201    | 0.0322 | 0.5083 | 0.0633    |
|            | Cow        | 0.2165 | 0.3295 | 0.6571    | 0.0291 | 0.5525 | 0.0527    |
|            | Dolphin    | 0.1794 | 0.1837 | 0.9766    | 0.0205 | 0.4026 | 0.0509    |

Table S1 Continued

| Species 1 | Species 2  | IDR    |        |           | Body   |        |           |
|-----------|------------|--------|--------|-----------|--------|--------|-----------|
|           |            | $d_N$  | $d_S$  | $d_N/d_S$ | $d_N$  | $d_S$  | $d_N/d_S$ |
| Marmoset  | Horse      | 0.2054 | 0.4870 | 0.4218    | 0.0315 | 0.3379 | 0.0932    |
|           | Dog        | 0.2386 | 0.2177 | 1.0960    | 0.0330 | 0.4264 | 0.0774    |
|           | Cat        | 0.2130 | 0.4226 | 0.5040    | 0.0337 | 0.4637 | 0.0727    |
|           | Mouse      | 0.3406 | 1.3061 | 0.2608    | 0.0259 | 0.5575 | 0.0465    |
|           | Rat        | 0.3926 | 1.6170 | 0.2428    | 0.0298 | 0.6072 | 0.0491    |
|           | Guinea pig | 0.4272 | 0.9178 | 0.4655    | 0.0530 | 0.6581 | 0.0805    |
|           | Tarsier    | 0.1304 | 0.2029 | 0.6427    | 0.0346 | 0.3005 | 0.1151    |
|           | Rabbit     | 0.1489 | 0.3010 | 0.4947    | 0.0299 | 0.3472 | 0.0861    |
|           | Pika       | 0.2413 | 0.5592 | 0.4315    | 0.0401 | 0.5483 | 0.0731    |
|           | Cow        | 0.2158 | 0.3326 | 0.6488    | 0.0369 | 0.5504 | 0.0670    |
|           | Dolphin    | 0.1788 | 0.1853 | 0.9649    | 0.0296 | 0.4027 | 0.0735    |
| Tarsier   | Horse      | 0.2286 | 0.4099 | 0.5577    | 0.0386 | 0.3490 | 0.1106    |
|           | Dog        | 0.2251 | 0.2524 | 0.8918    | 0.0423 | 0.4450 | 0.0951    |
|           | Cat        | 0.2583 | 0.3490 | 0.7401    | 0.0422 | 0.4492 | 0.0939    |
|           | Mouse      | 0.3055 | 1.3061 | 0.2339    | 0.0343 | 0.6084 | 0.0564    |
|           | Rat        | 0.3926 | 2.5914 | 0.1515    | 0.0377 | 0.7319 | 0.0515    |
|           | Guinea pig | 0.4256 | 0.9313 | 0.4570    | 0.0585 | 0.6890 | 0.0849    |
|           | Rabbit     | 0.0600 | 0.1073 | 0.5592    | 0.0275 | 0.3435 | 0.0801    |
|           | Pika       | 0.1316 | 0.4674 | 0.2816    | 0.0364 | 0.5635 | 0.0646    |
|           | Cow        | 0.1103 | 0.2635 | 0.4186    | 0.0322 | 0.6074 | 0.0530    |
|           | Dolphin    | 0.0780 | 0.1290 | 0.6047    | 0.0275 | 0.4243 | 0.0648    |
|           | Horse      | 0.0957 | 0.3326 | 0.2877    | 0.0354 | 0.3577 | 0.0990    |
| Rabbit    | Dog        | 0.1098 | 0.1868 | 0.5878    | 0.0370 | 0.3853 | 0.0960    |
|           | Cat        | 0.1590 | 0.3099 | 0.5131    | 0.0361 | 0.3844 | 0.0939    |
|           | Mouse      | 0.2683 | 1.0892 | 0.2463    | 0.0314 | 0.6311 | 0.0498    |
|           | Rat        | 0.3154 | 1.8318 | 0.1722    | 0.0361 | 0.6540 | 0.0552    |
|           | Guinea pig | 0.3975 | 0.9178 | 0.4331    | 0.0514 | 0.7208 | 0.0713    |
|           | Pika       | 0.0604 | 0.4608 | 0.1311    | 0.0170 | 0.3563 | 0.0477    |
|           | Cow        | 0.1517 | 0.2947 | 0.5148    | 0.0268 | 0.5869 | 0.0457    |
|           | Dolphin    | 0.0397 | 0.1643 | 0.2416    | 0.0213 | 0.4503 | 0.0473    |
|           | Horse      | 0.1827 | 0.3916 | 0.4665    | 0.0229 | 0.3729 | 0.0614    |
|           | Dog        | 0.1773 | 0.2180 | 0.8133    | 0.0346 | 0.4419 | 0.0783    |
|           | Cat        | 0.2561 | 0.3658 | 0.7001    | 0.0283 | 0.4367 | 0.0648    |
| Pika      | Mouse      | 0.3213 | 1.1765 | 0.2731    | 0.0190 | 0.5587 | 0.0340    |
|           | Rat        | 0.3597 | 1.1861 | 0.3033    | 0.0236 | 0.5908 | 0.0399    |
|           | Guinea pig | 0.3501 | 1.0714 | 0.3268    | 0.0339 | 0.6528 | 0.0519    |
|           | Cow        | 0.2218 | 0.4586 | 0.4836    | 0.0373 | 0.7123 | 0.0524    |
|           | Dolphin    | 0.1590 | 0.4452 | 0.3571    | 0.0314 | 0.6124 | 0.0513    |
|           | Horse      | 0.2068 | 0.6655 | 0.3107    | 0.0355 | 0.5008 | 0.0709    |
|           | Dog        | 0.2275 | 0.4693 | 0.4848    | 0.0434 | 0.6735 | 0.0644    |
|           | Cat        | 0.2978 | 0.5429 | 0.5485    | 0.0346 | 0.6620 | 0.0523    |
|           | Mouse      | 0.3213 | 0.9241 | 0.3477    | 0.0354 | 0.6200 | 0.0571    |
|           | Rat        | 0.2901 | 1.1861 | 0.2446    | 0.0401 | 0.7198 | 0.0557    |
|           | Guinea pig | 0.4780 | 0.7037 | 0.6793    | 0.0518 | 0.7532 | 0.0688    |
| Cow       | Dolphin    | 0.1505 | 0.0954 | 1.5776    | 0.0229 | 0.3044 | 0.0752    |
|           | Horse      | 0.2286 | 0.2064 | 1.1076    | 0.0284 | 0.3442 | 0.0825    |
|           | Dog        | 0.2127 | 0.1585 | 1.3420    | 0.0409 | 0.4518 | 0.0905    |
|           | Cat        | 0.2583 | 0.2138 | 1.2081    | 0.0306 | 0.4513 | 0.0678    |
|           | Mouse      | 0.3701 | 0.8740 | 0.4235    | 0.0361 | 0.8683 | 0.0416    |
|           | Rat        | 0.4232 | 1.9237 | 0.2200    | 0.0385 | 0.7946 | 0.0485    |

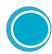**Table S1 Continued**

| Species 1 | Species 2  | IDR    |        |           | Body   |        |           |
|-----------|------------|--------|--------|-----------|--------|--------|-----------|
|           |            | $d_N$  | $d_S$  | $d_N/d_S$ | $d_N$  | $d_S$  | $d_N/d_S$ |
| Dolphin   | Guinea pig | 0.3817 | 0.6208 | 0.6149    | 0.0515 | 0.7589 | 0.0679    |
|           | Horse      | 0.1815 | 0.2064 | 0.8794    | 0.0299 | 0.1974 | 0.1515    |
|           | Dog        | 0.1650 | 0.0492 | 3.3537    | 0.0314 | 0.2922 | 0.1075    |
|           | Cat        | 0.2349 | 0.1544 | 1.5214    | 0.0283 | 0.2793 | 0.1013    |
|           | Mouse      | 0.3041 | 1.0397 | 0.2925    | 0.0282 | 0.7807 | 0.0361    |
| Horse     | Rat        | 0.3536 | 1.6805 | 0.2104    | 0.0314 | 0.7932 | 0.0396    |
|           | Guinea pig | 0.3817 | 0.7301 | 0.5228    | 0.0490 | 0.7717 | 0.0635    |
|           | Dog        | 0.1521 | 0.2177 | 0.6987    | 0.0474 | 0.2588 | 0.1832    |
|           | Cat        | 0.1797 | 0.2758 | 0.6516    | 0.0386 | 0.2795 | 0.1381    |
|           | Mouse      | 0.3423 | 0.7940 | 0.4311    | 0.0322 | 0.6407 | 0.0503    |
| Dog       | Rat        | 0.4273 | 0.9607 | 0.4448    | 0.0362 | 0.6450 | 0.0561    |
|           | Guinea pig | 0.5244 | 0.6816 | 0.7694    | 0.0500 | 0.6355 | 0.0787    |
|           | Cat        | 0.1290 | 0.1355 | 0.9520    | 0.0244 | 0.2369 | 0.1030    |
|           | Mouse      | 0.3089 | 0.7739 | 0.3991    | 0.0346 | 0.6765 | 0.0511    |
| Cat       | Rat        | 0.2870 | 1.6841 | 0.1704    | 0.0362 | 0.7140 | 0.0507    |
|           | Guinea pig | 0.5769 | 0.6649 | 0.8676    | 0.0523 | 0.6959 | 0.0752    |
|           | Mouse      | 0.3503 | 0.7920 | 0.4423    | 0.0290 | 0.7893 | 0.0367    |
|           | Rat        | 0.4019 | 0.9313 | 0.4315    | 0.0306 | 0.8020 | 0.0382    |
| Mouse     | Guinea pig | 0.5456 | 0.6053 | 0.9014    | 0.0506 | 0.7445 | 0.0680    |
|           | Rat        | 0.1618 | 0.4879 | 0.3316    | 0.0045 | 0.1833 | 0.0245    |
|           | Guinea pig | 0.6132 | 0.9435 | 0.6499    | 0.0331 | 0.7597 | 0.0436    |
| Rat       | Guinea pig | 0.5573 | 1.2745 | 0.4373    | 0.0363 | 0.8011 | 0.0453    |

Received 30 October 2012/20 November 2012; accepted 22 November 2012

Published as Immediate Publication 26 November 2012, doi 10.1042/BSR20120112
